# Supplementary material
Source: PubMed Central journal article supplement (PMC6426636)

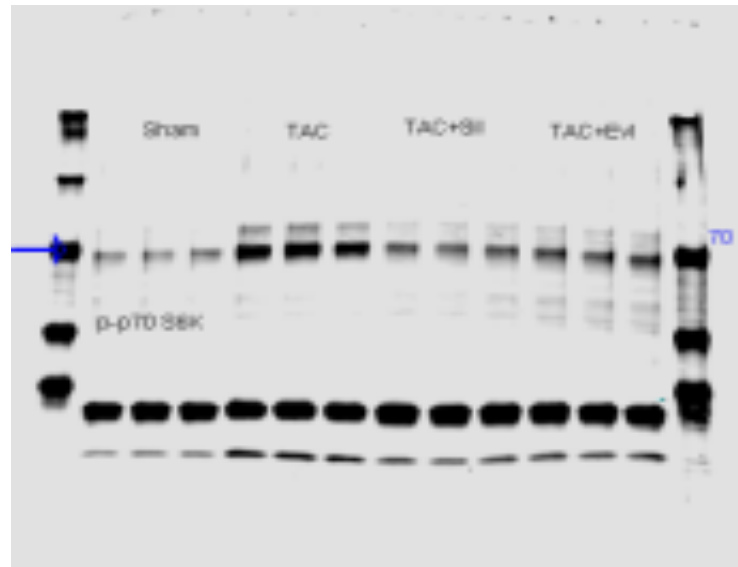

P and total  
p70S6K

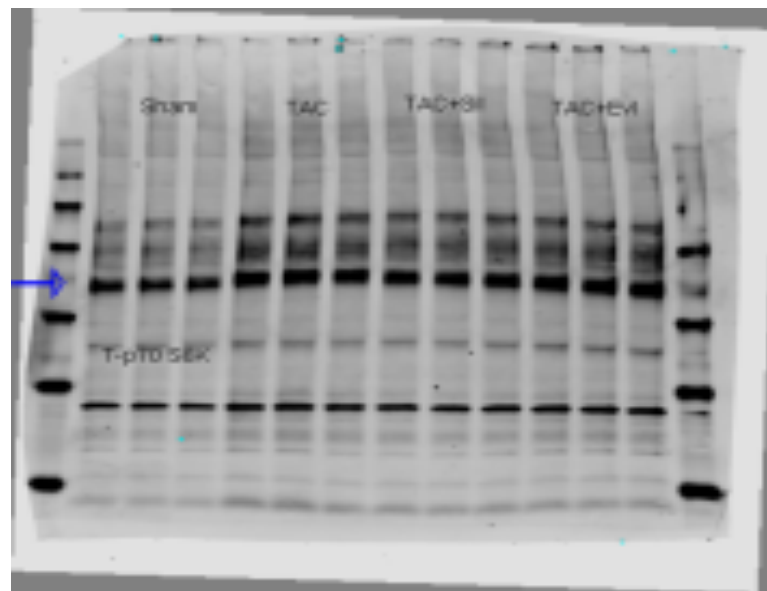

Figure 1A upper (Replicate 1)

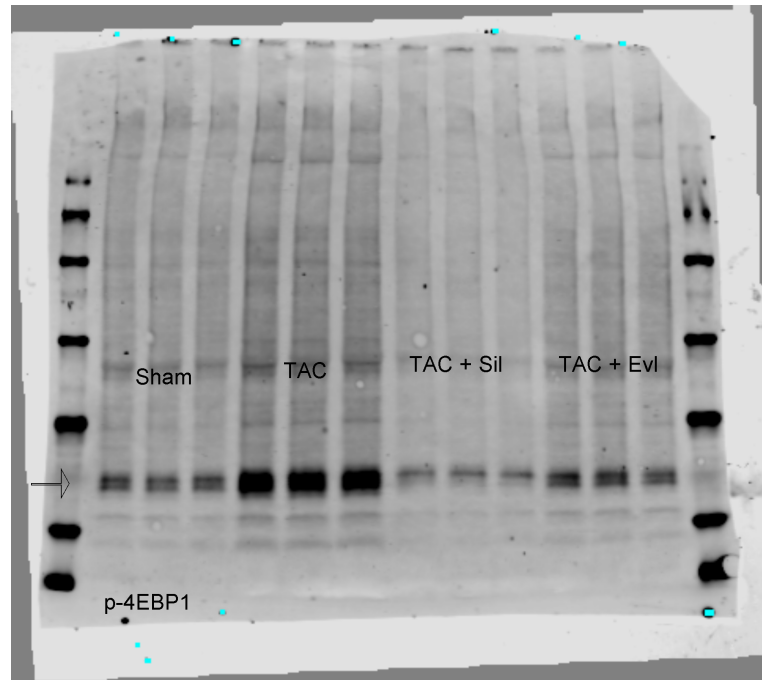

P and total  
4EBP1

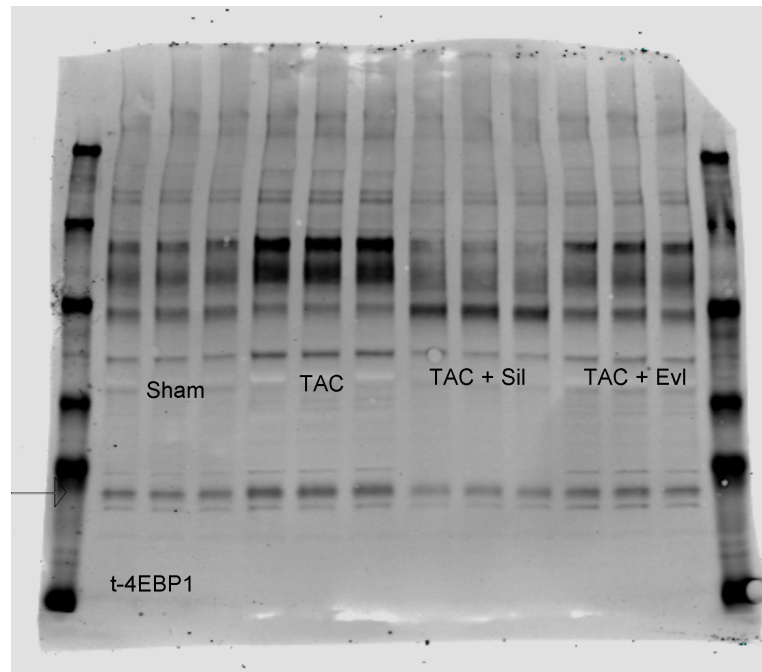

Figure 1A mid (Replicate 1)

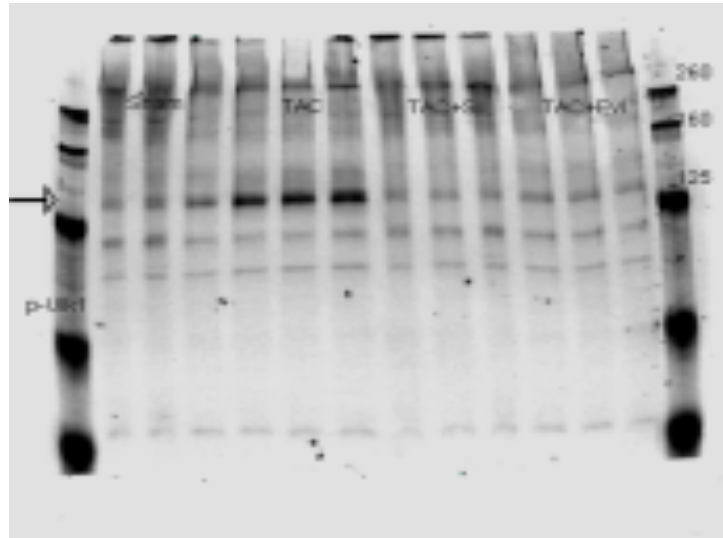

P and total  
Ulk1

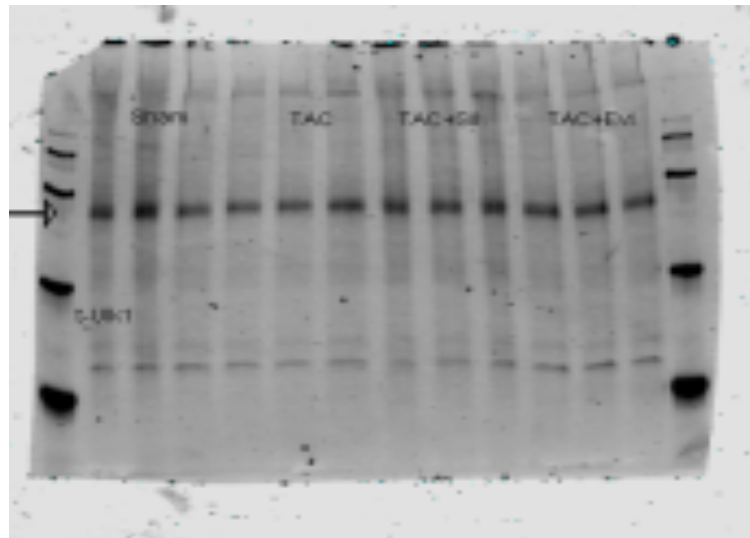

Figure 1A lower (Replicate 1)

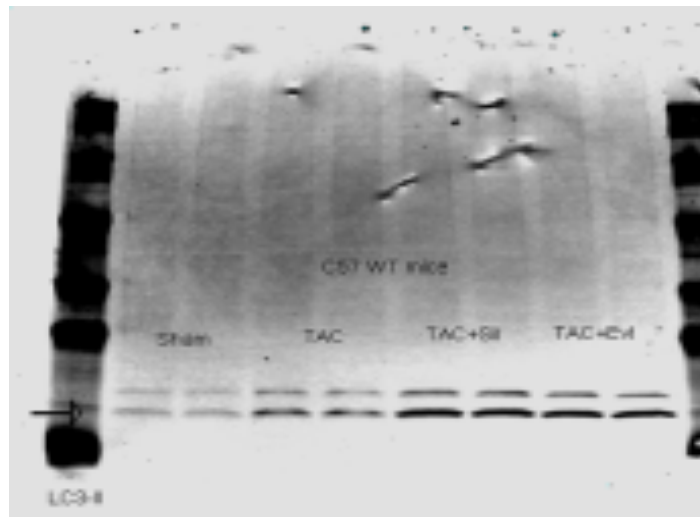

Upper LC3-II and lower  
GAPDH

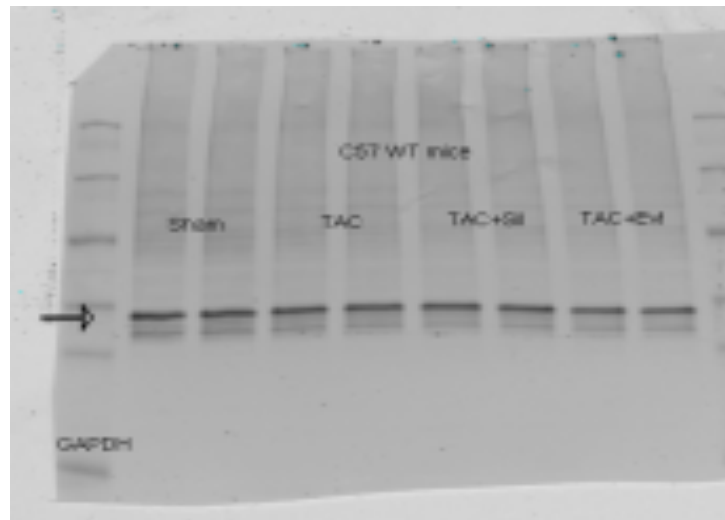

Figure 1B: upper Replicate 3

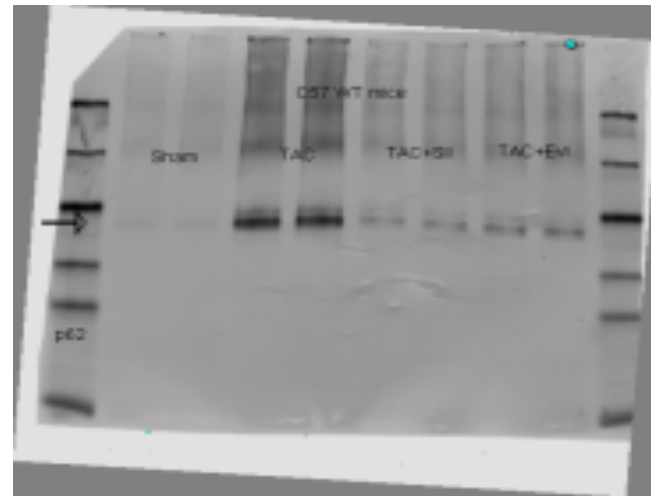

P62 and GAPDH

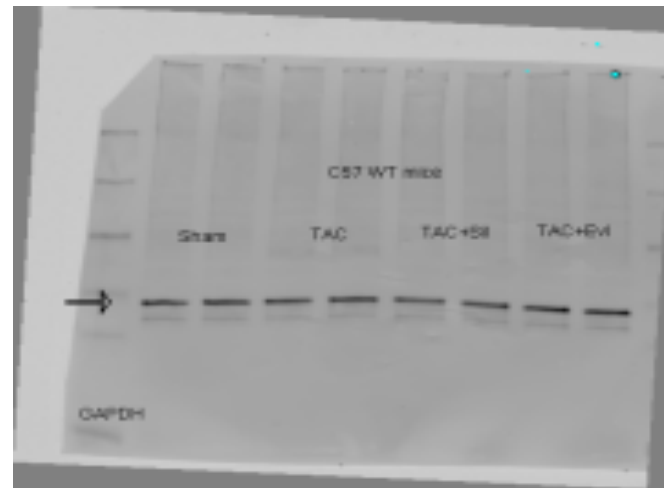

Figure 1B: lower Replicate 2

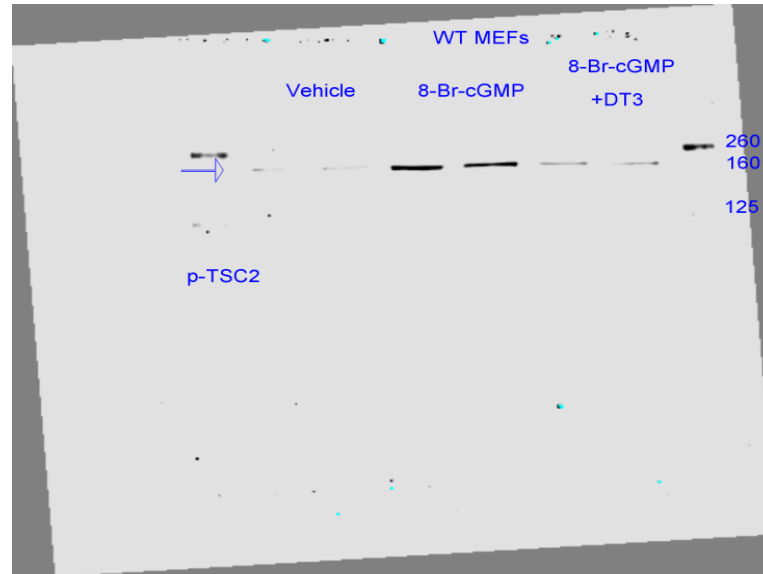

pTSC2-1365 and total TSC2

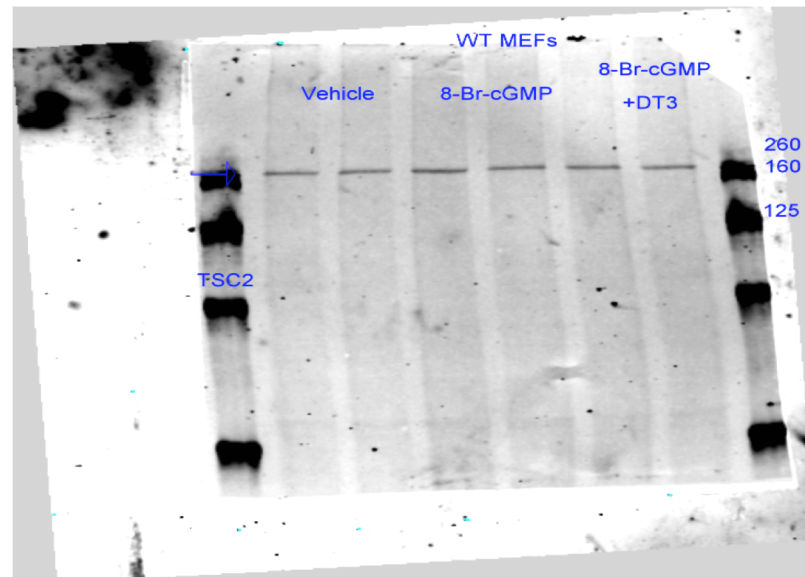

Figure 1e upper. Replicate 3

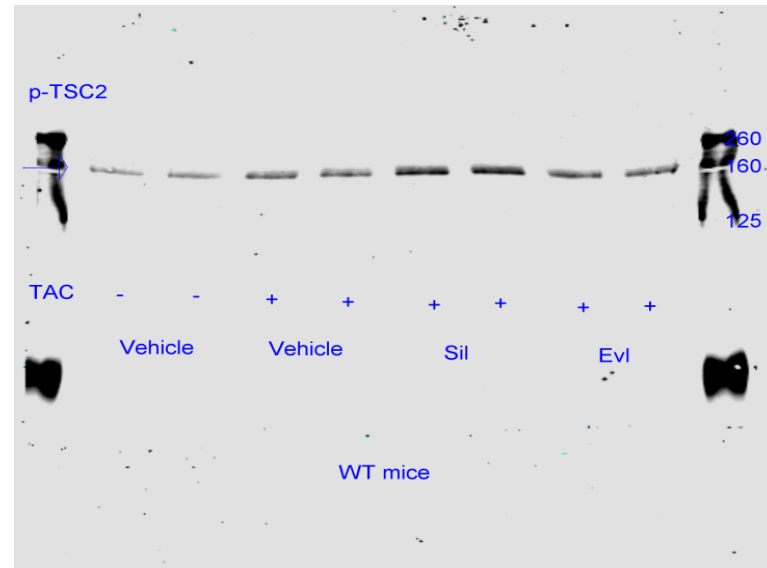

pTSC2-1365 and total TSC2  
For intact heart data

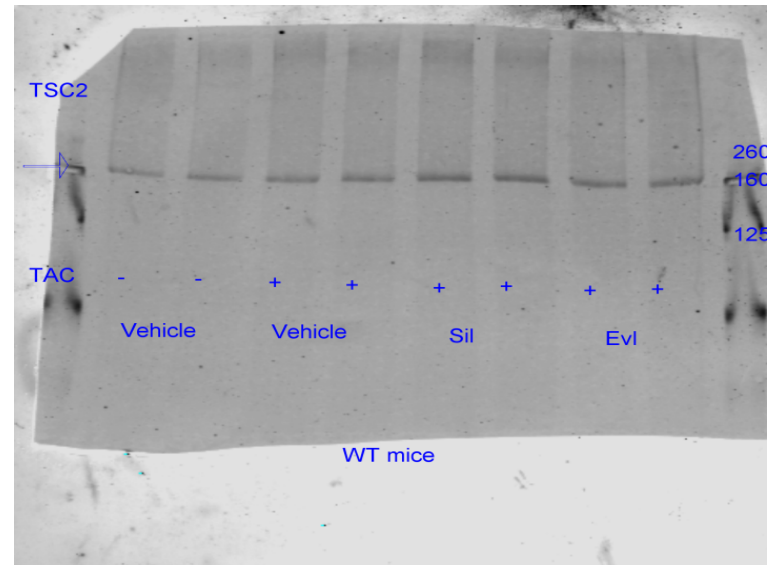

Figure 1e lower. Replicate 1

pTSC2-1365 and total TSC2  
For human data

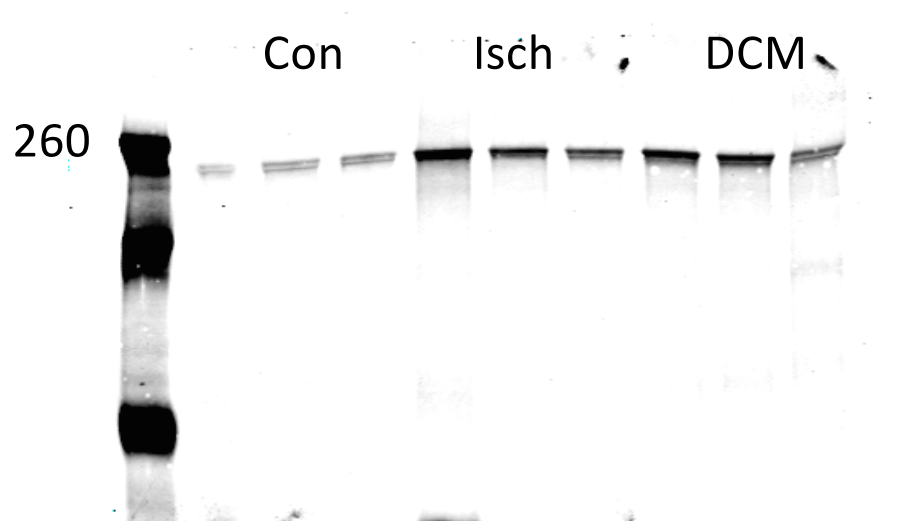

pTSC2 S1365

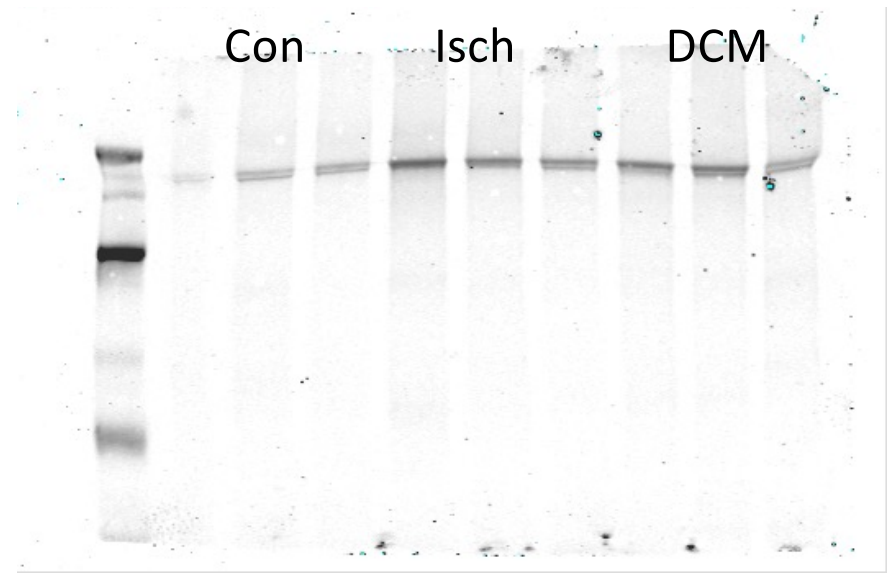

tTSC2 S1365

Figure 1h. Gel 2 20171228



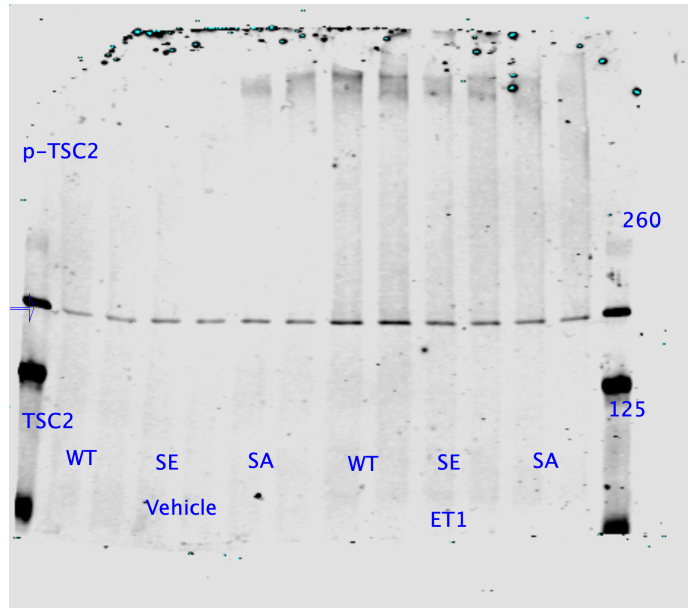

pTSC2-1365 and total TSC2  
For cultured cardiomyocyte data

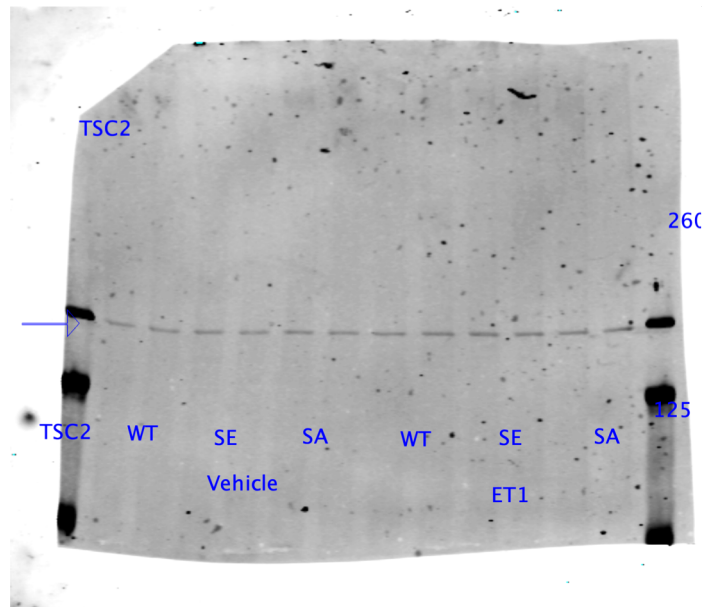

Figure 1i – Gel 1. Phospho and Total TSC2

$^{33}\text{P}$ -TSC2 (top gel)

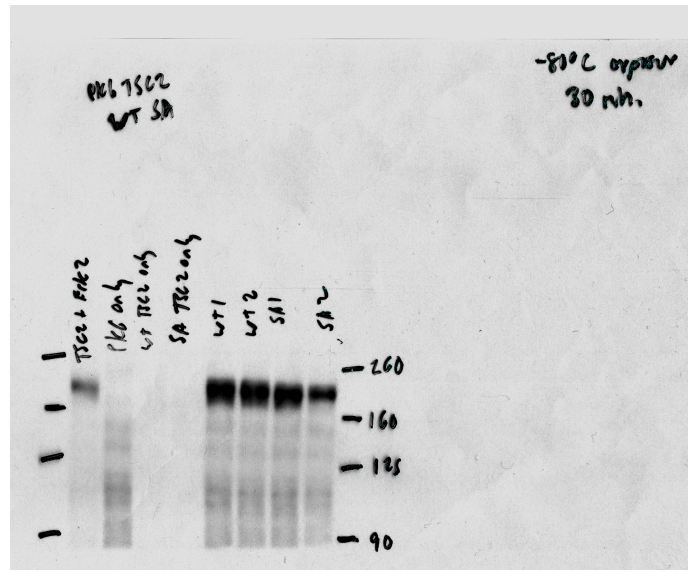

TSC2 phosphorylation, total  
TSC2, and HA-TSC2  
For radioactive kinase assay

TSC2 (middle gel)

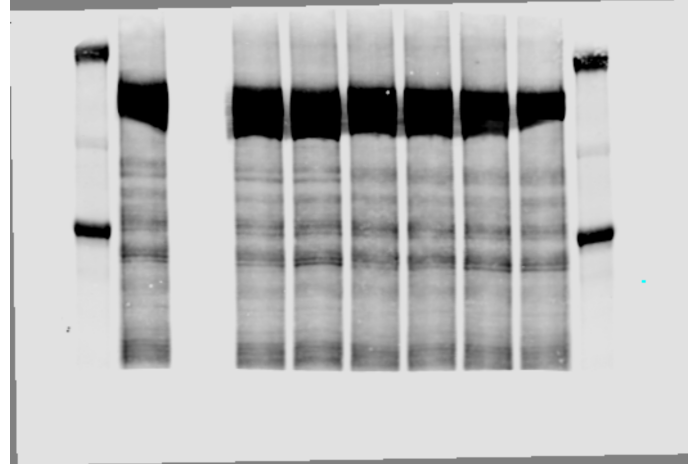

HA (lower gel)

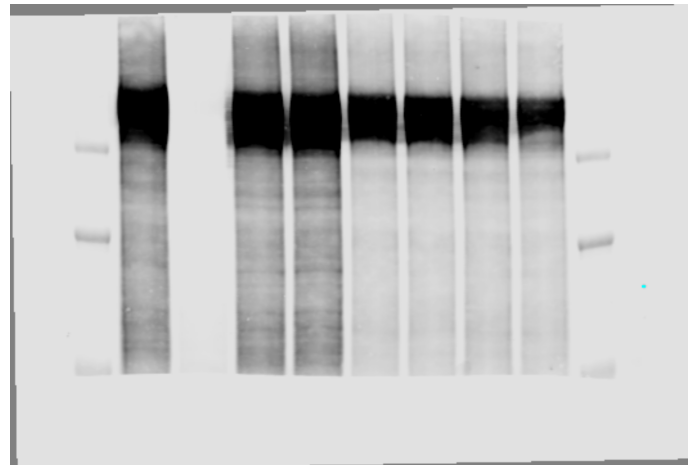

Figure 1j

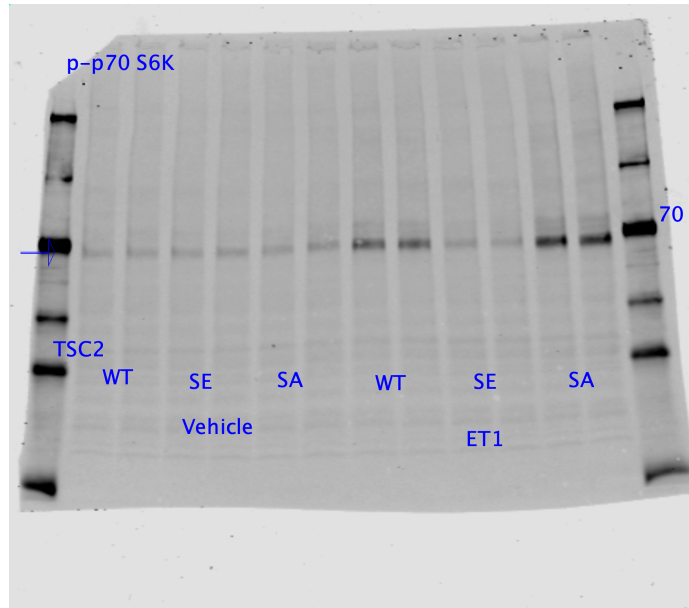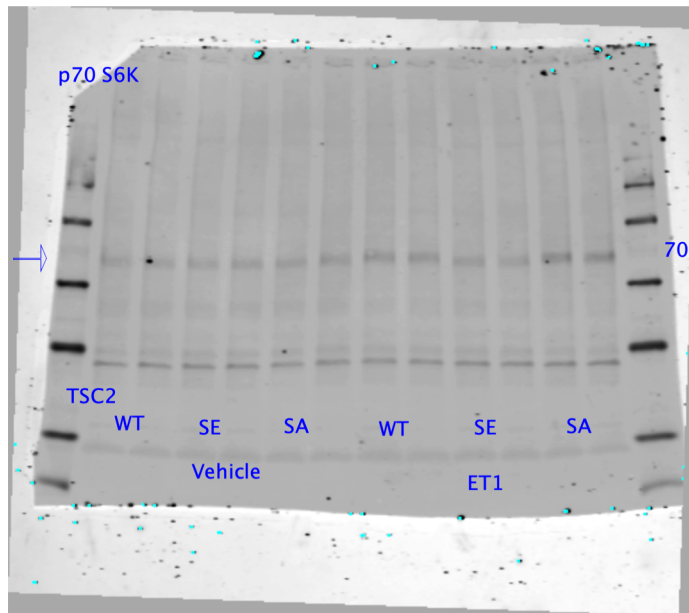

Figure 2b (upper panels) – Gel 5. p/t p70S6K

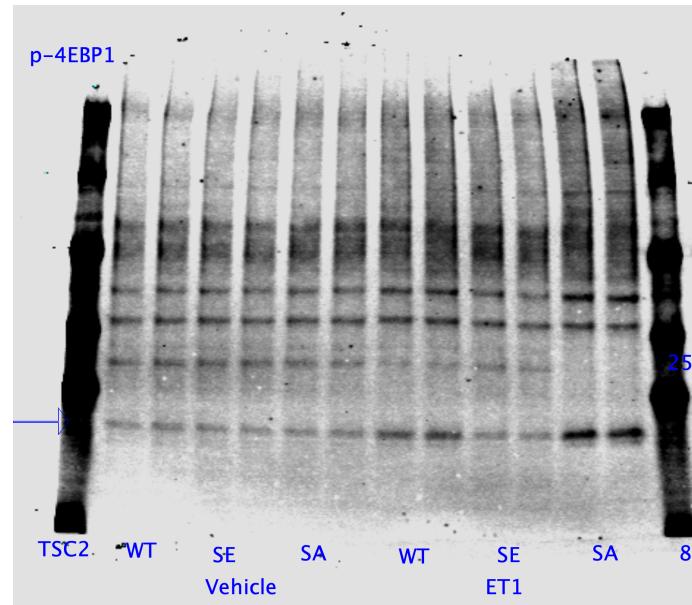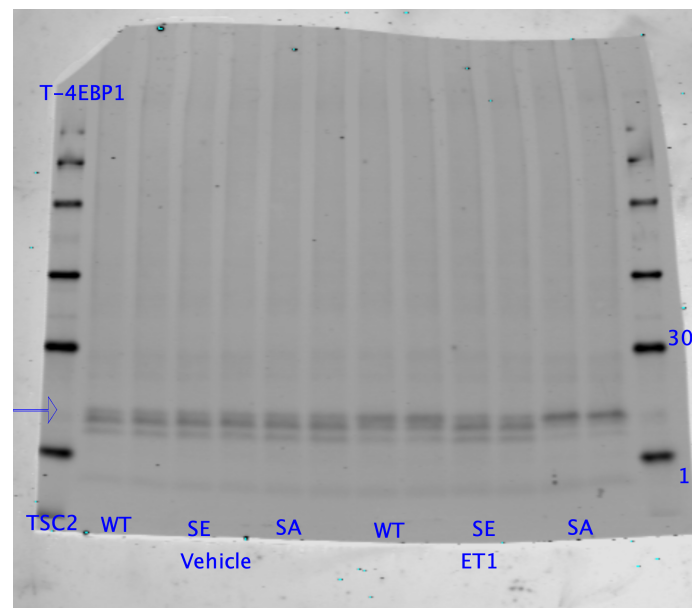

Figure 2b (middle panels)– Gel 3. p/t 4EBP1

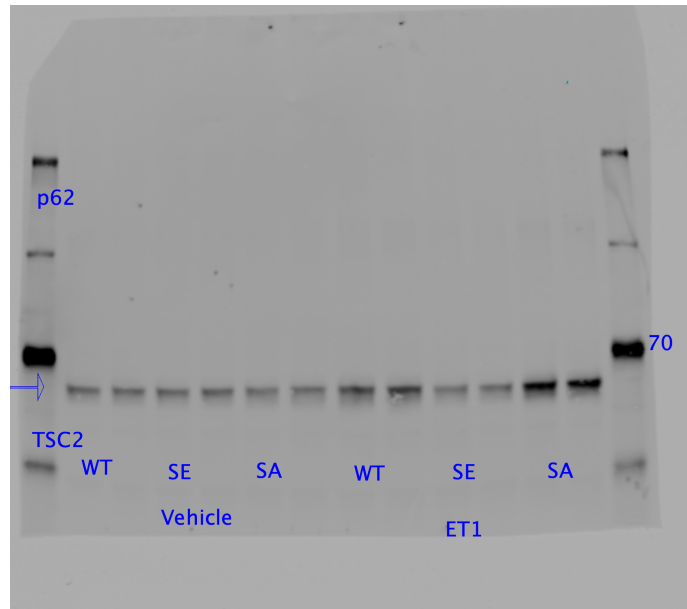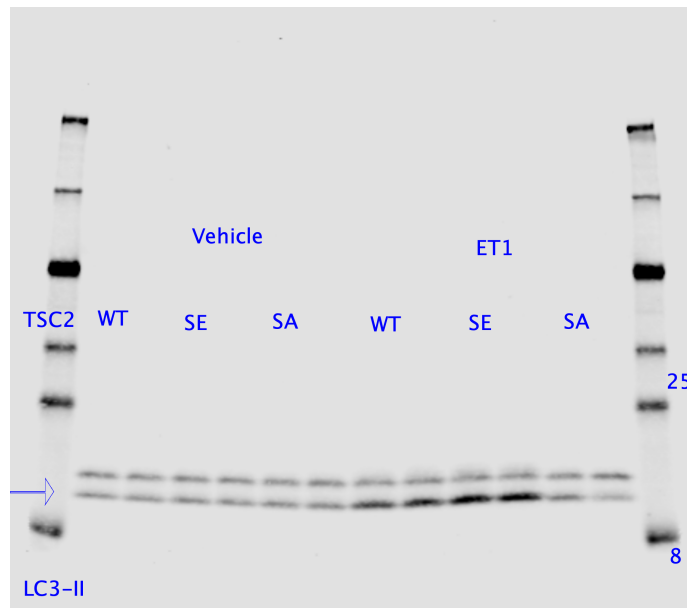

Figure 2b (lower panels)– Gel 3. p62 and Gel1. LC3

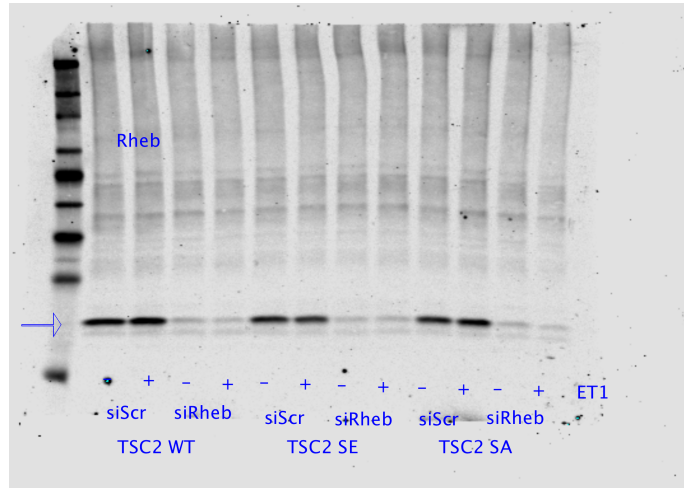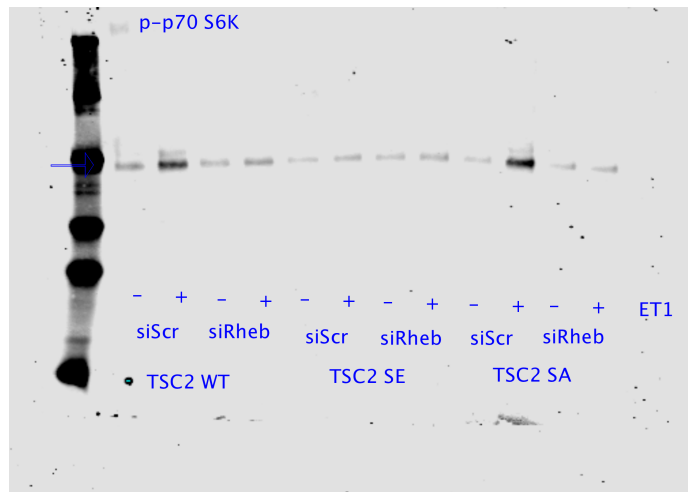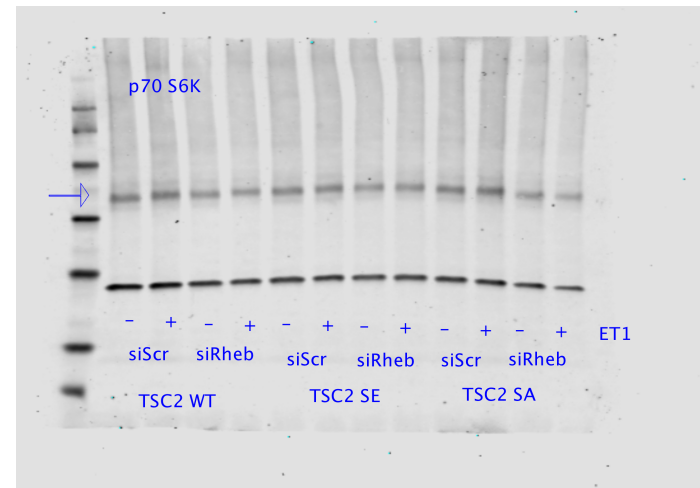

Figure 2d – replicate 4. Rheb total protein; p/t p70S6K

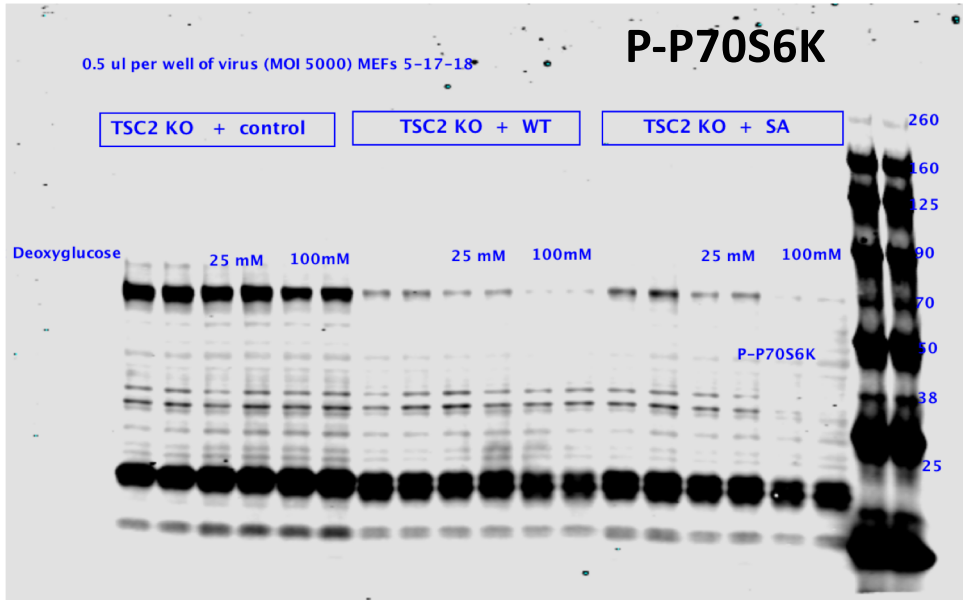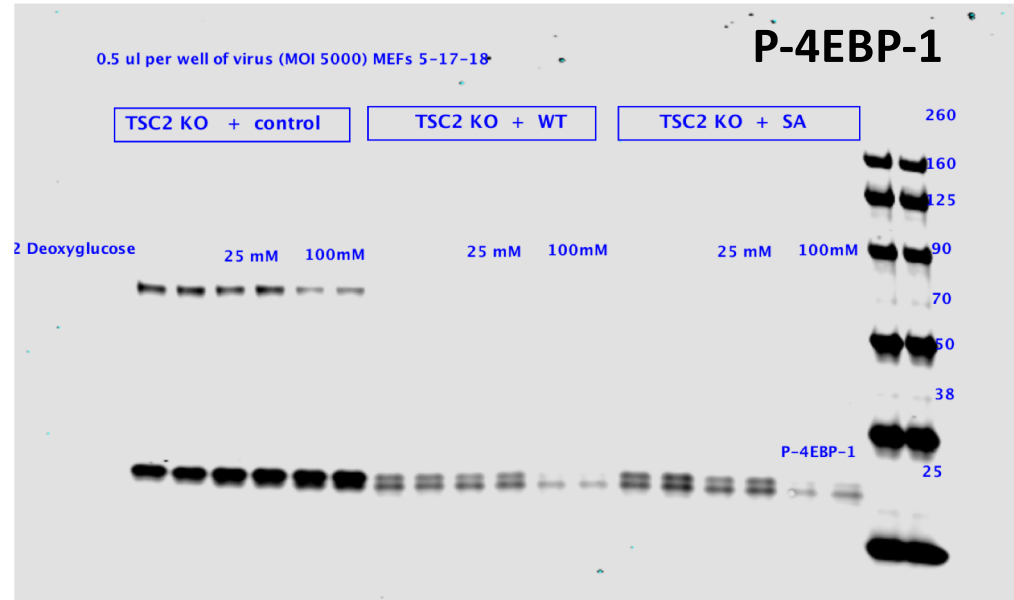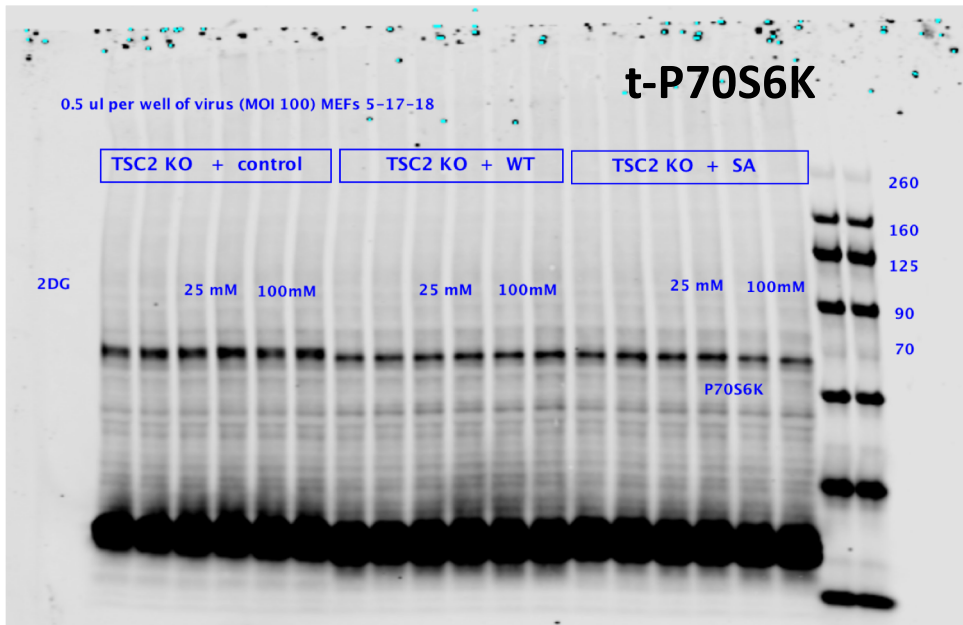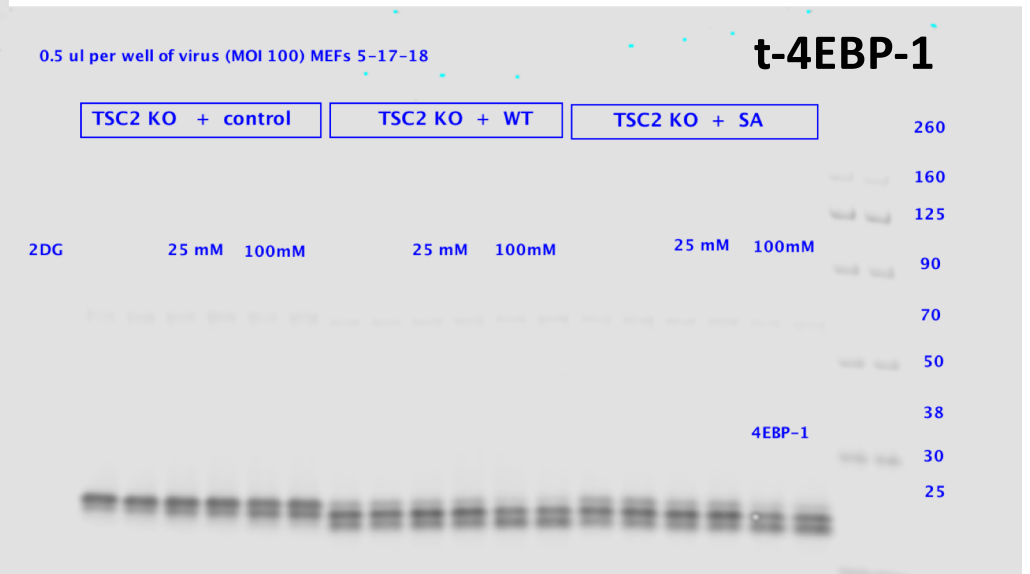

Figure 2E (Run set 1)

→  
p-TSC2 S1387

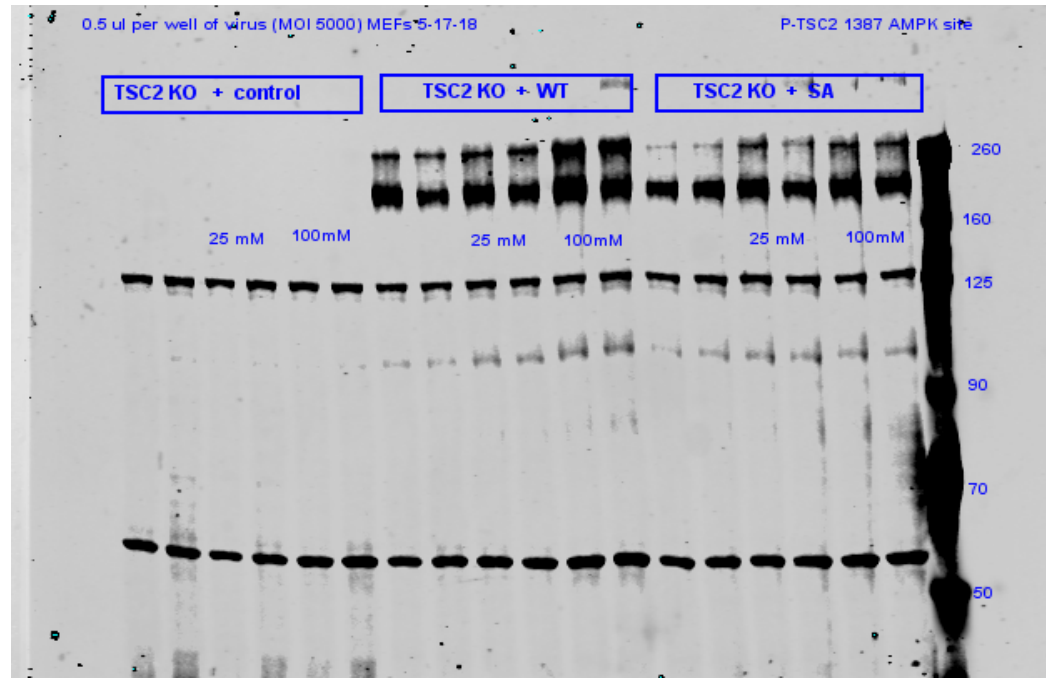

Total TSC2

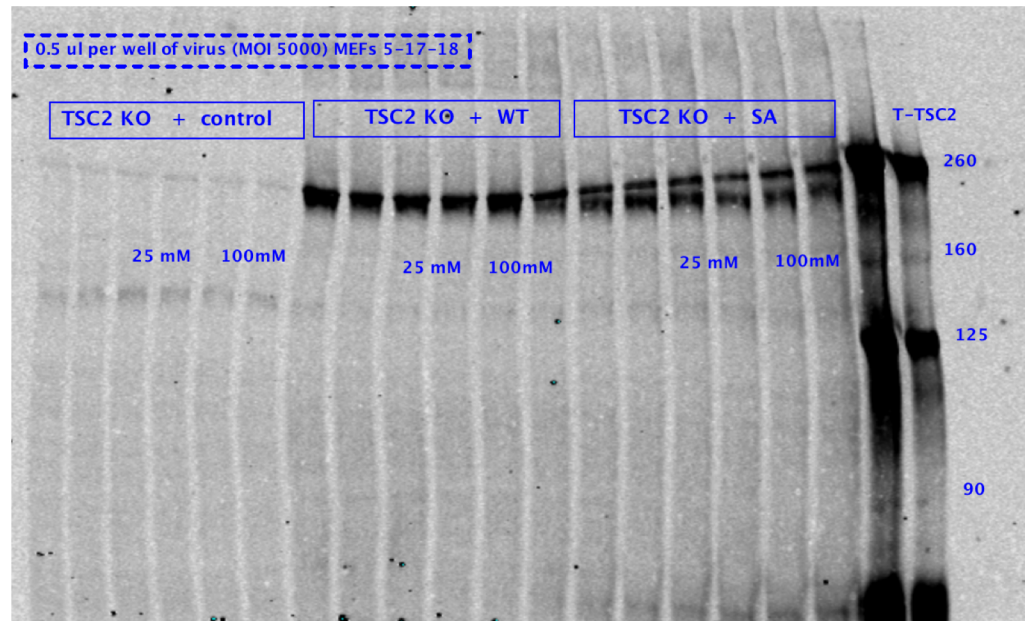

Figure 2E (Run set 1)



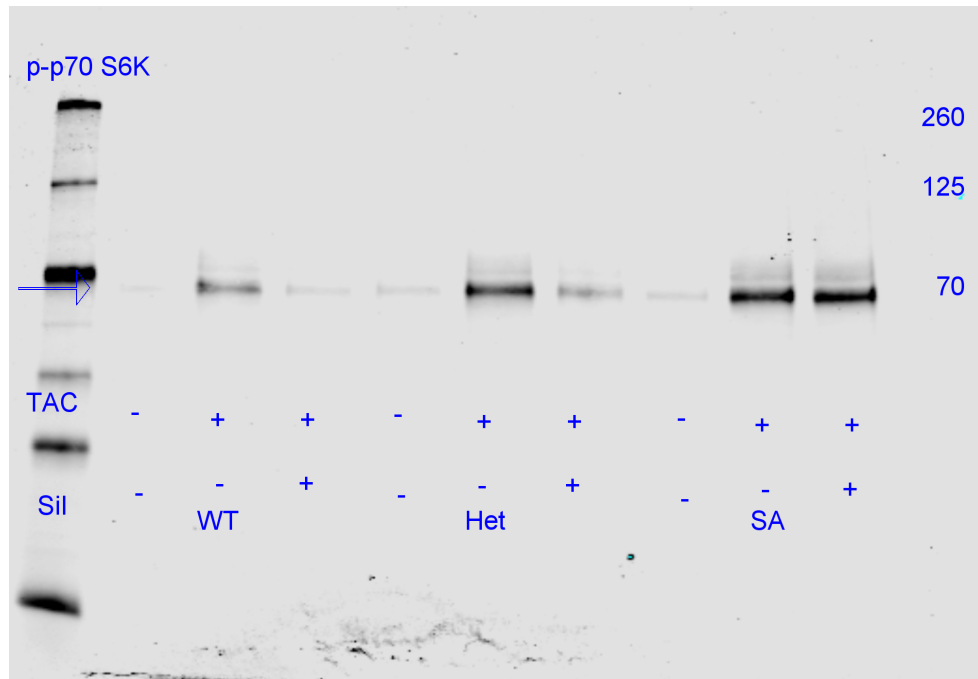

Phospho- (upper)  
and total (lower)  
p70S6K gels

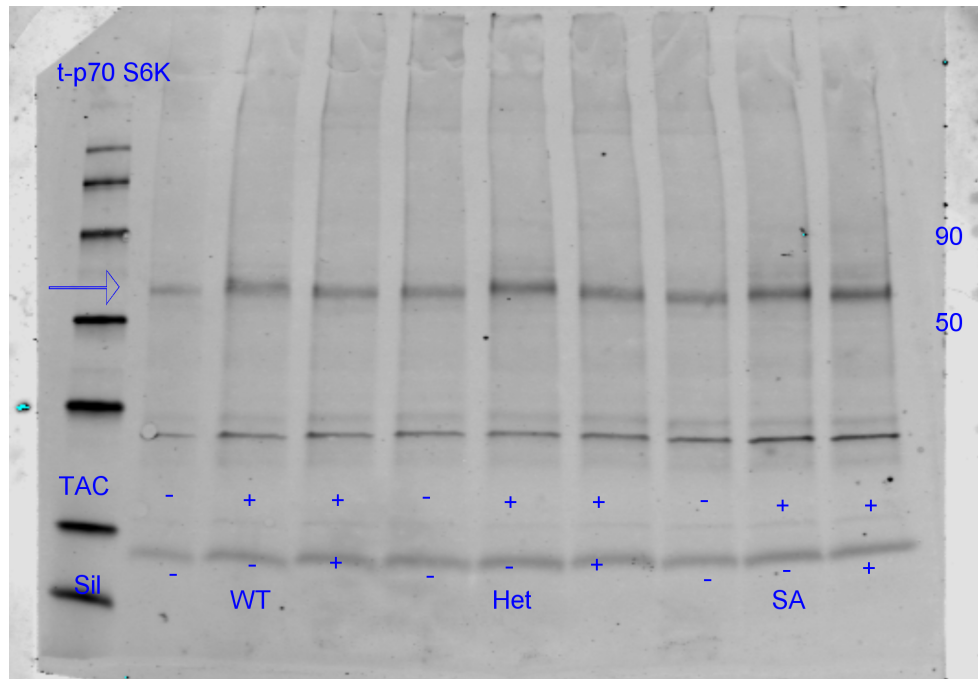

Figure 3e – upper. Replicate 4

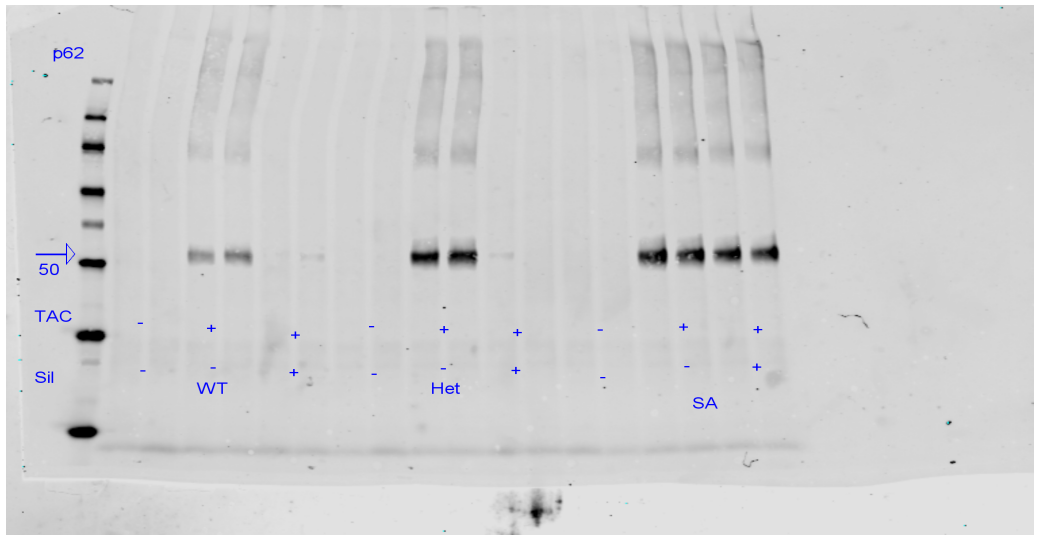

p62 (upper) and a-tubulin (lower)

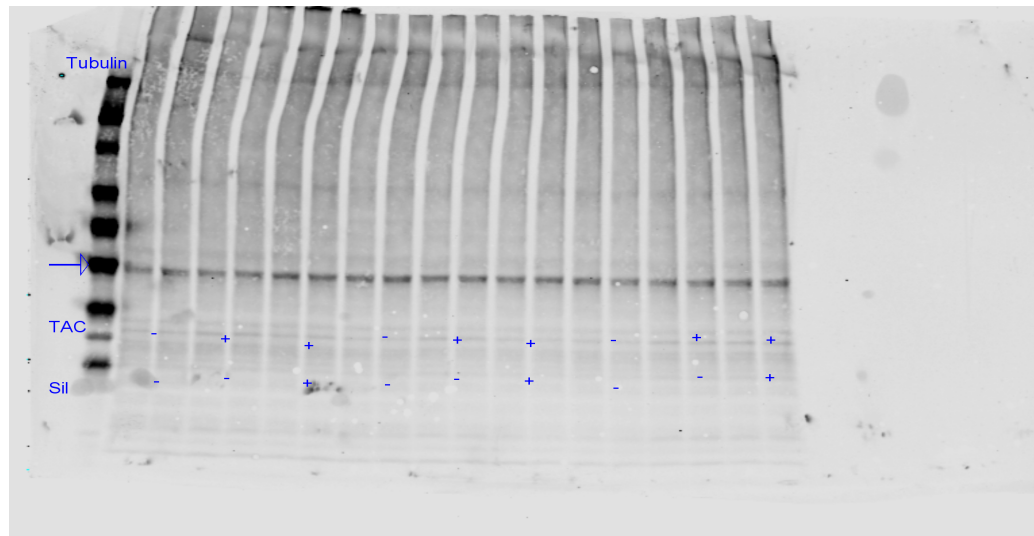

Figure 3e – lower. Replicate 4

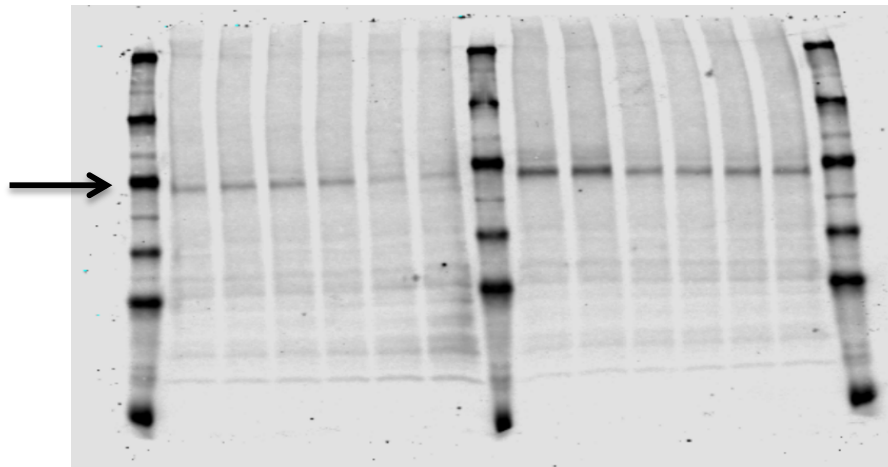

Phospho- (upper)  
and total (lower) for  
p70S6K

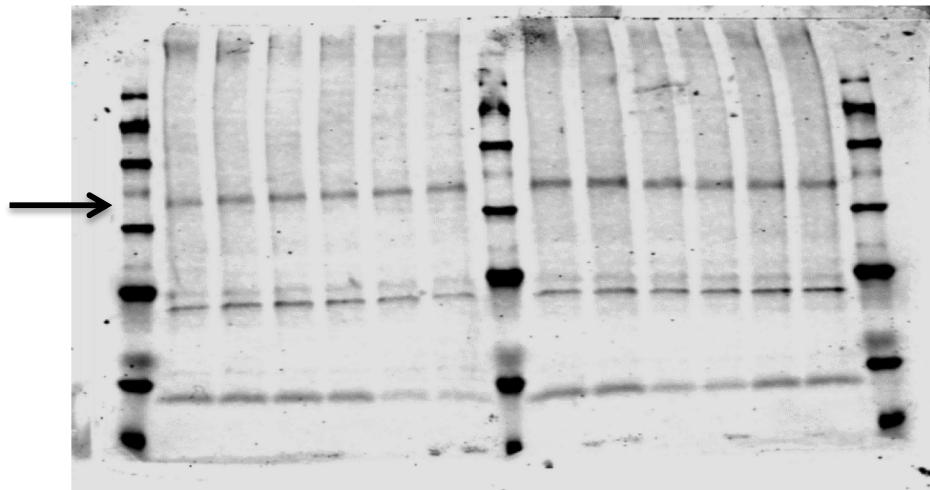

Figure 4f – upper. 11-10-17 membrane run 1

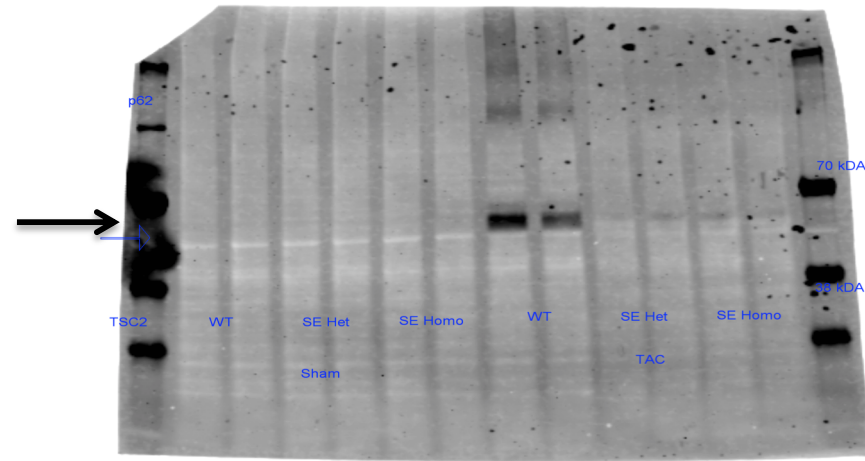

p62 and a-tubulin

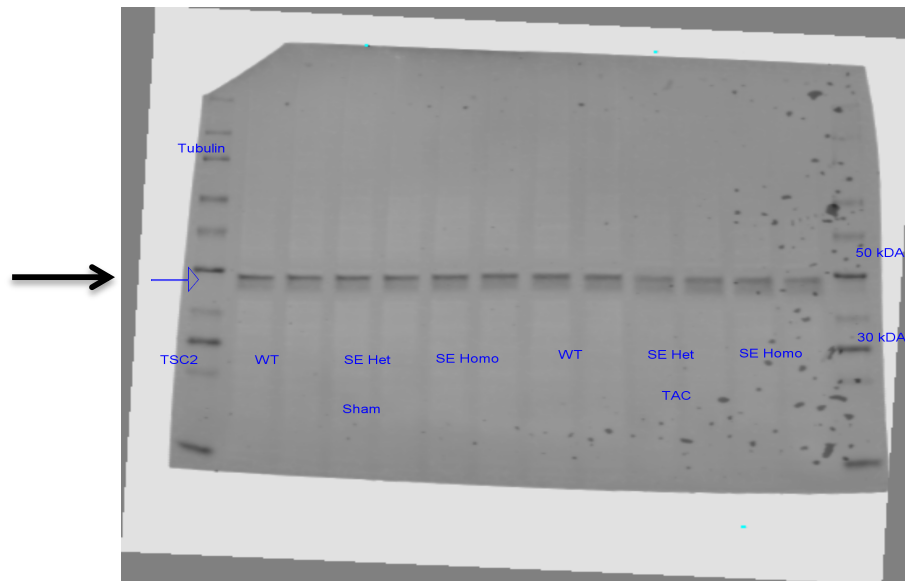

Figure 4f – mid. Gel 1-replicate

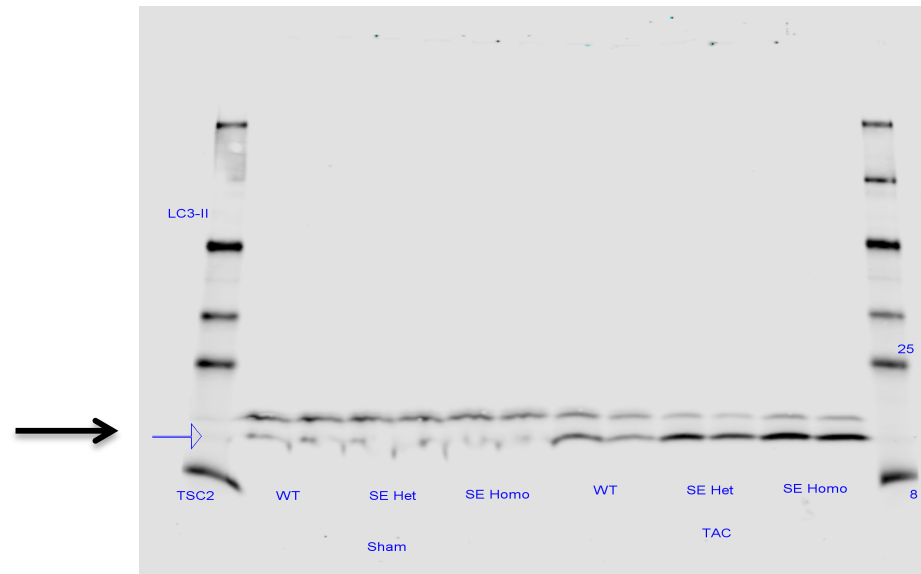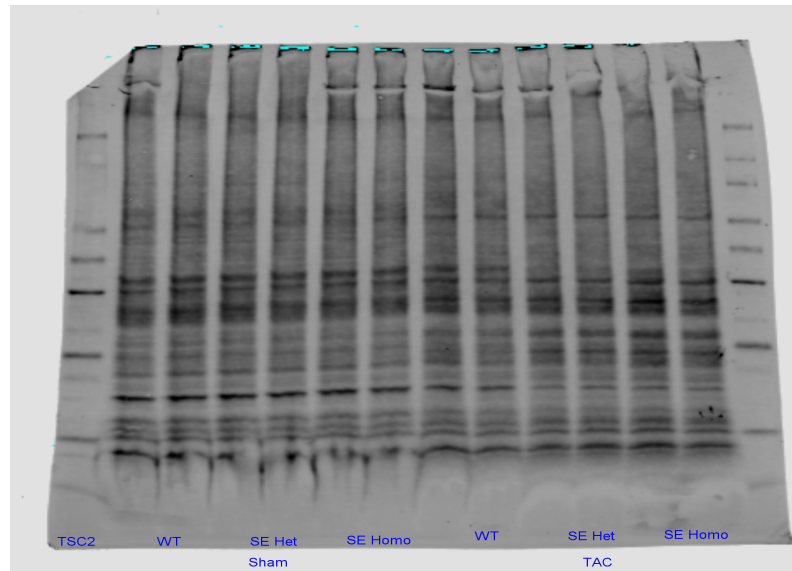

Figure 4f – lower. Gel 1

LC3-II

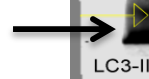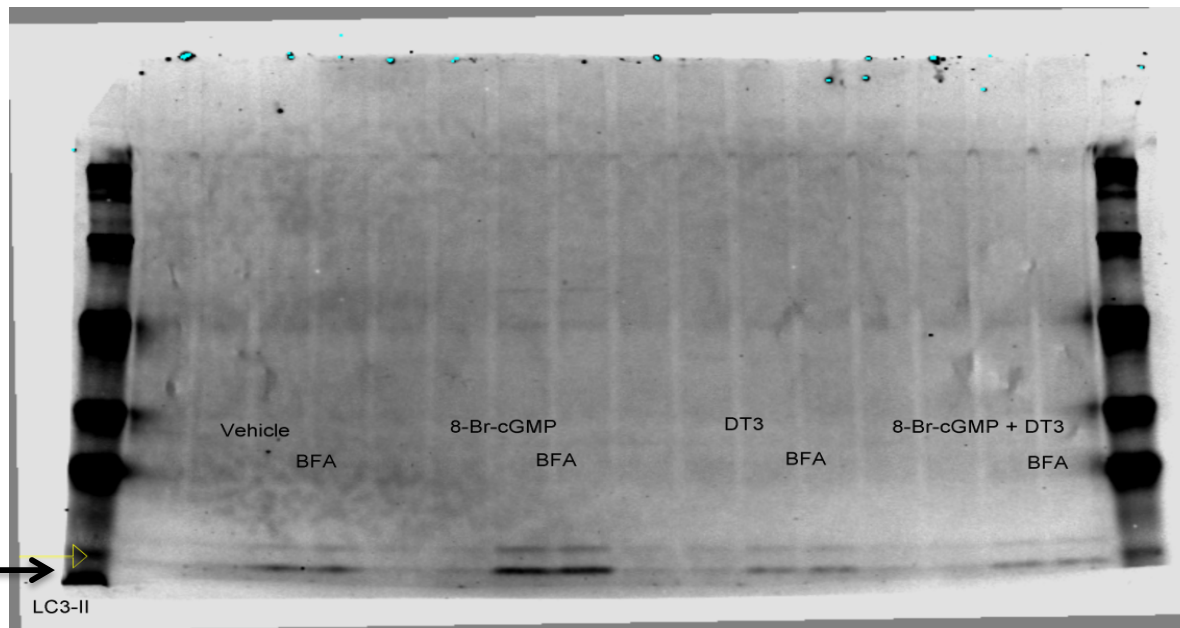

GAPDH

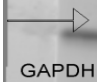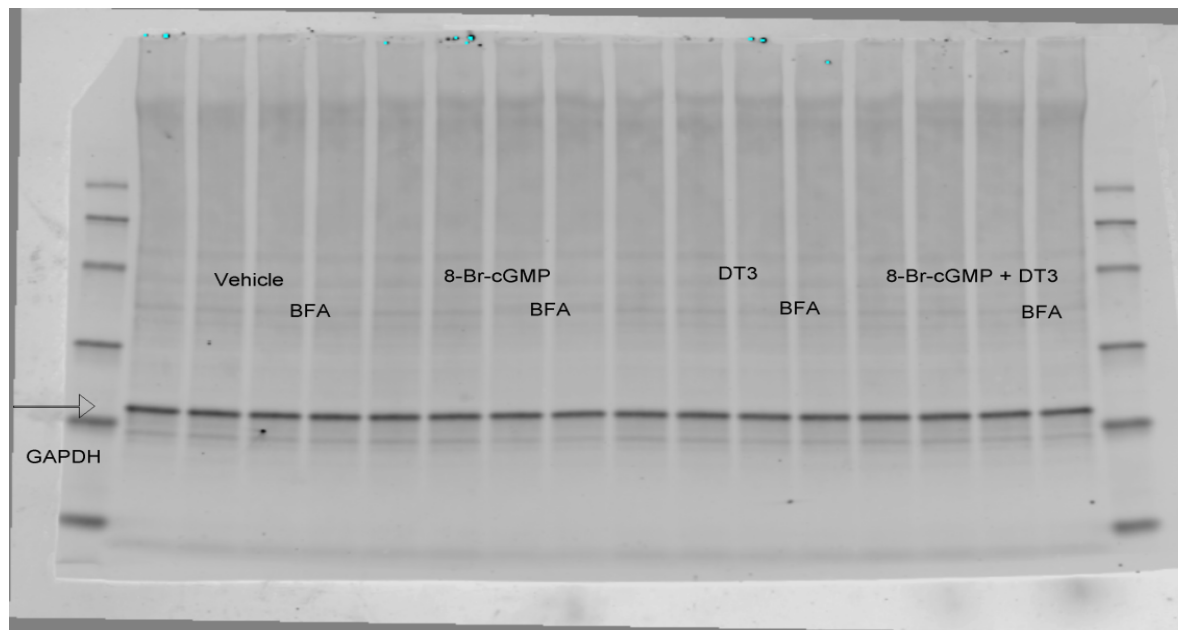

Extended Data 2A Gel 1

Total TSC2 at top,  
Alpha Tubulin below

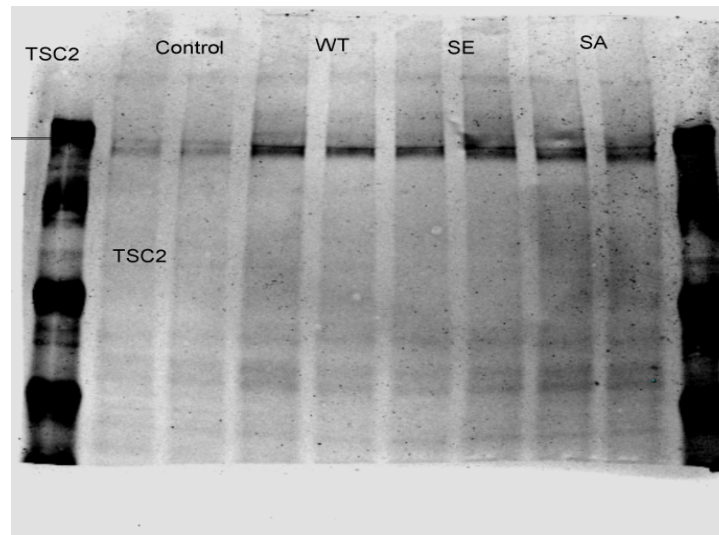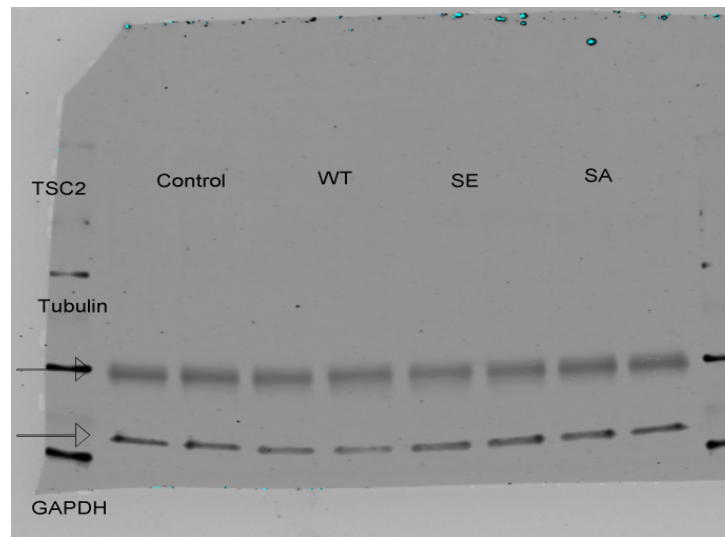

Extended Data 2e Gel

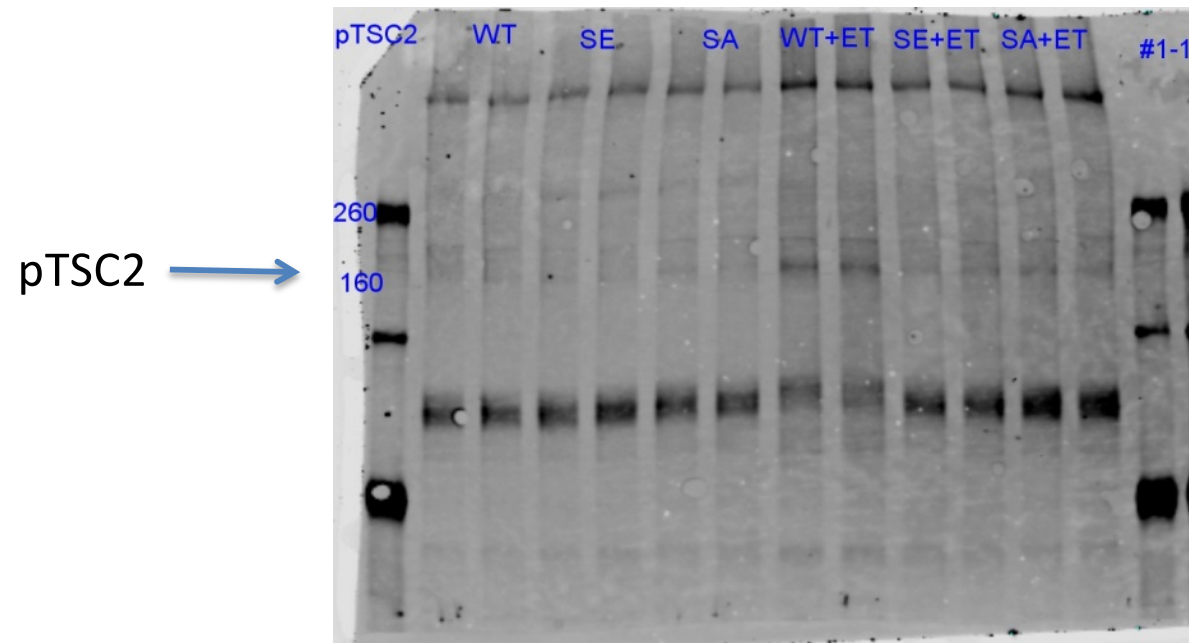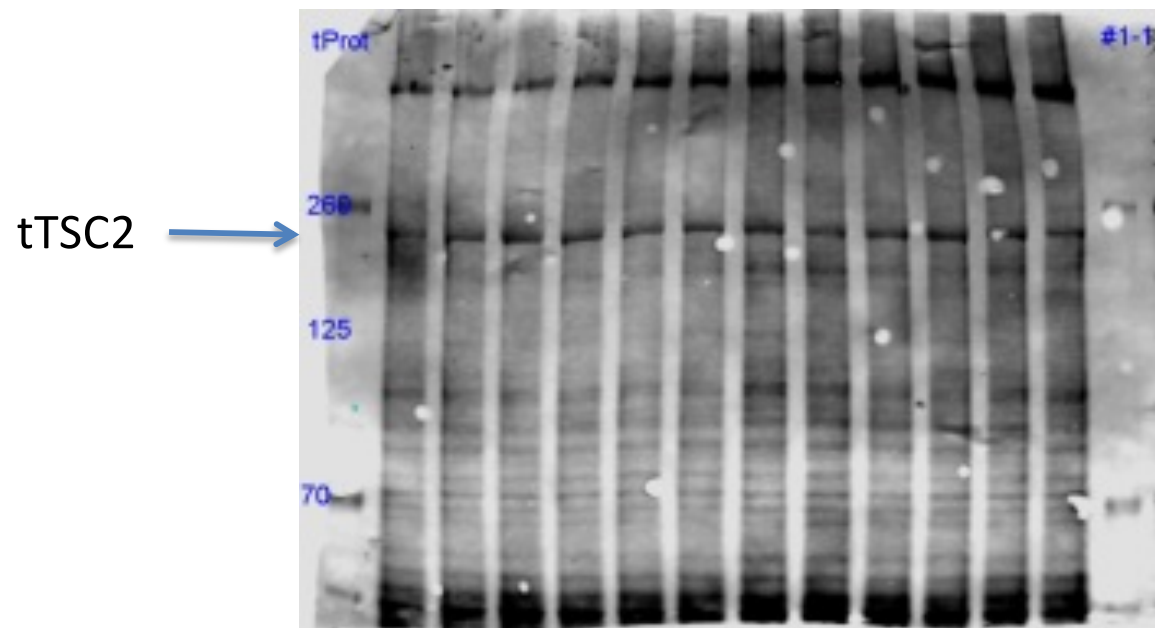

Extended Data 3d - Run 1 from 48 hr exp.



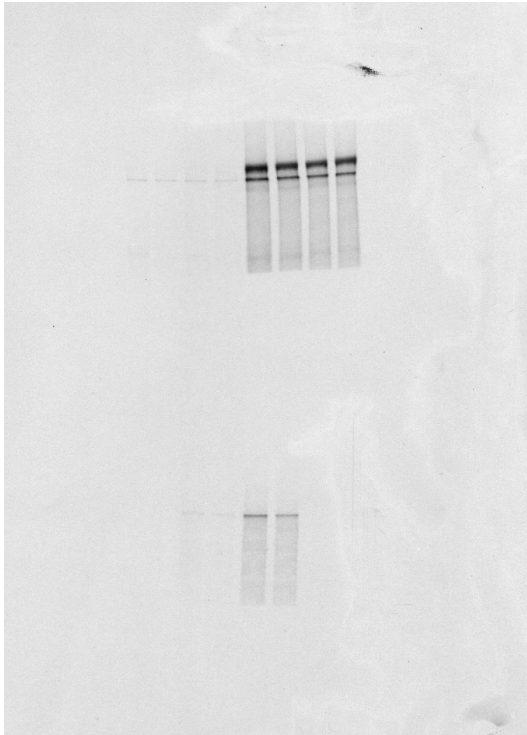

$^{33}\text{P}$ -TSC2 (top gel)

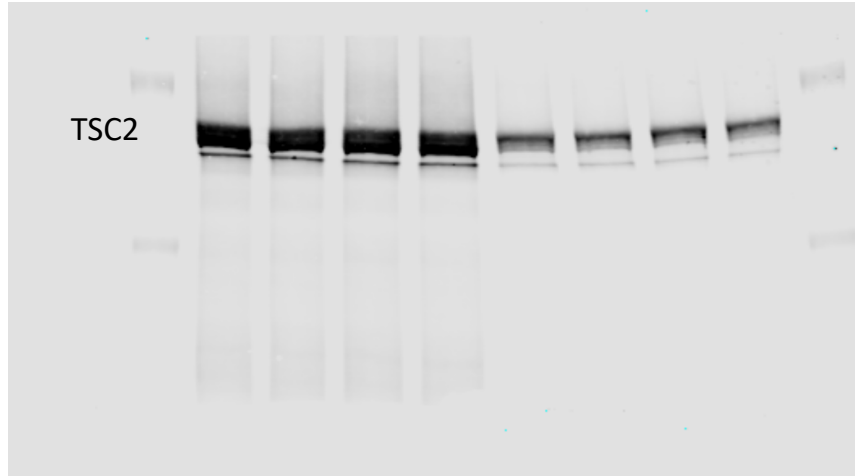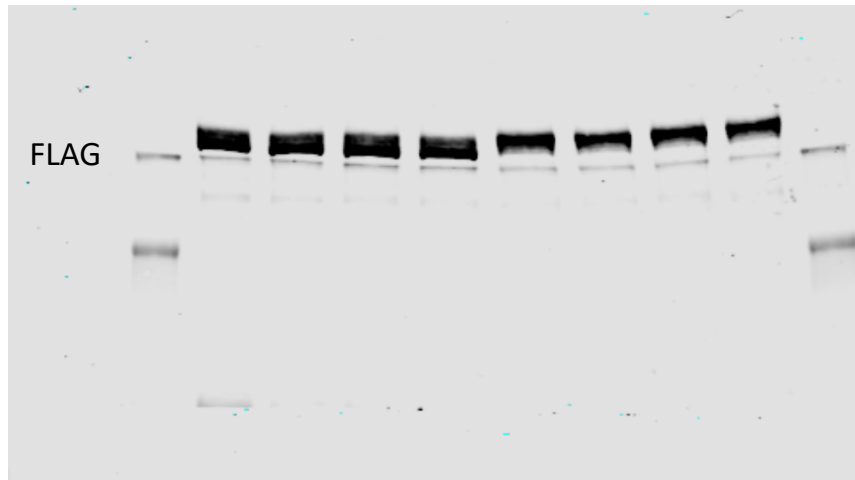

Extended Data Figure 3e.

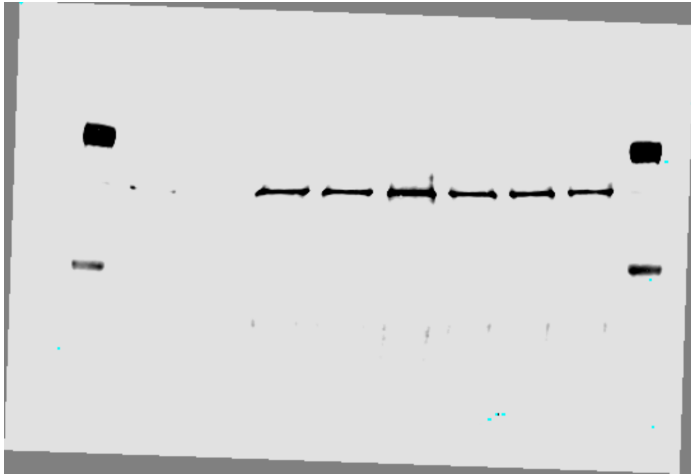

Thiophosphate ester

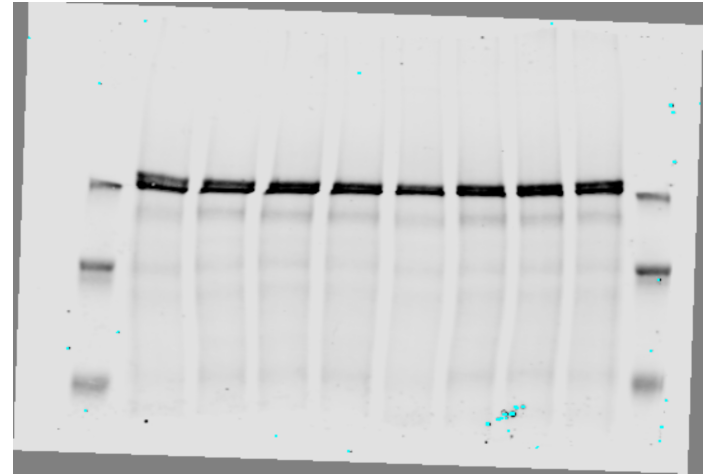

HA

Extended Data Figure 3f (upper panels).

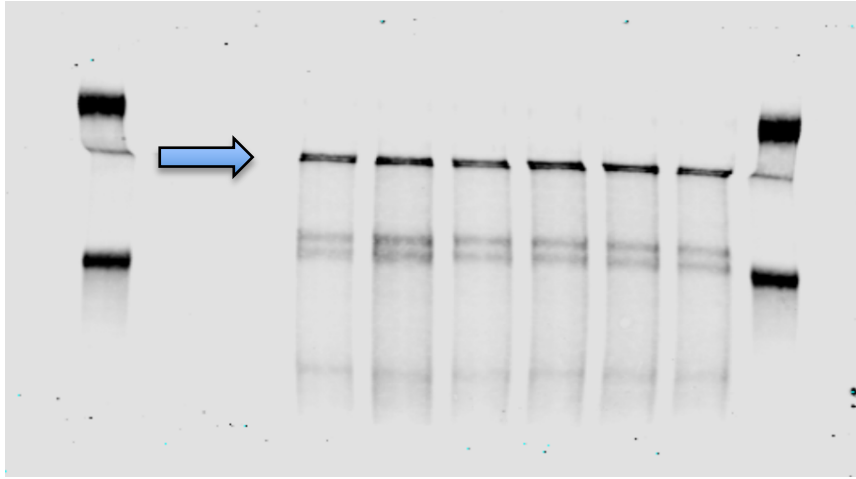

Thiophosphate ester

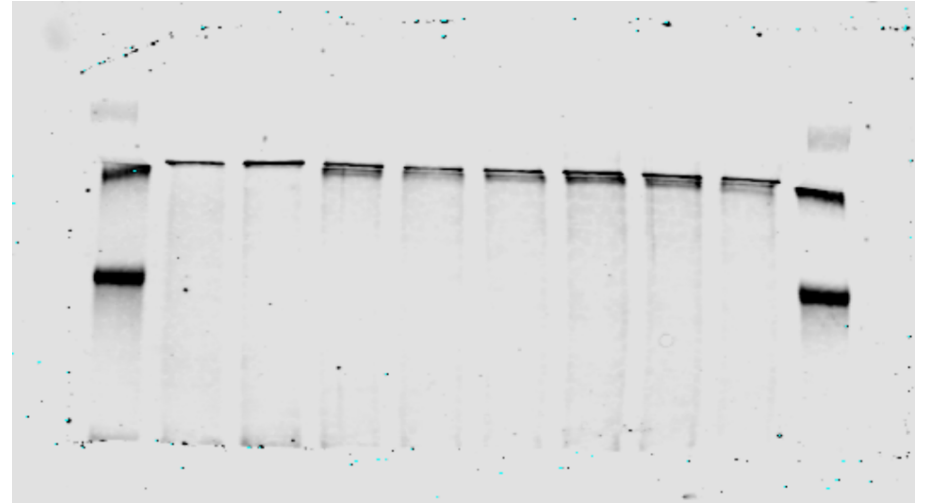

FLAG

Extended Data Figure 3f (lower panels).

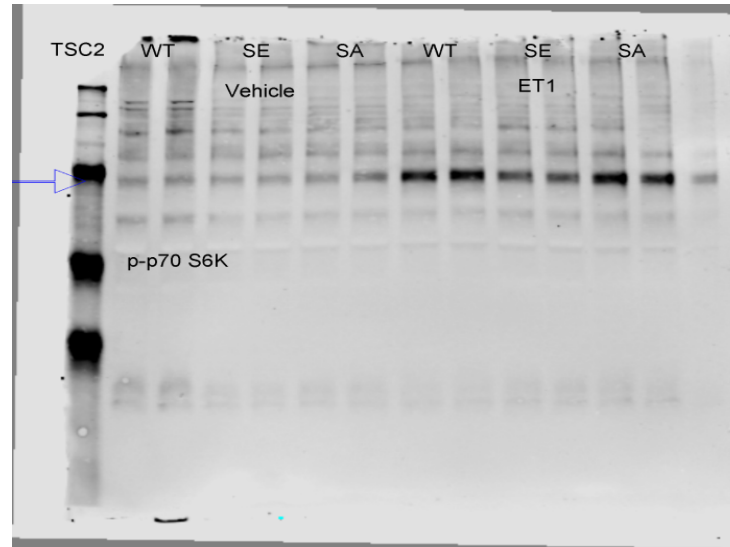

p70S6K cell with mutants  
Phospho upper,  
total lower

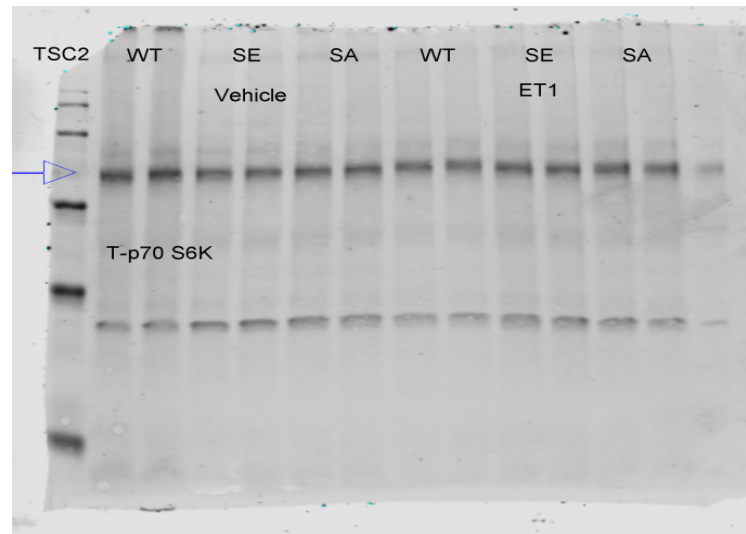

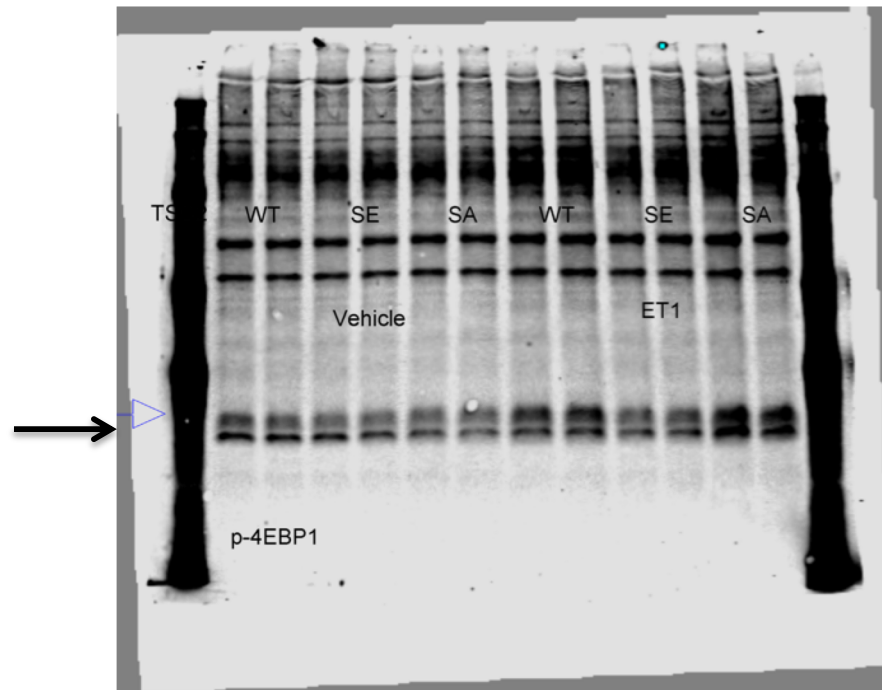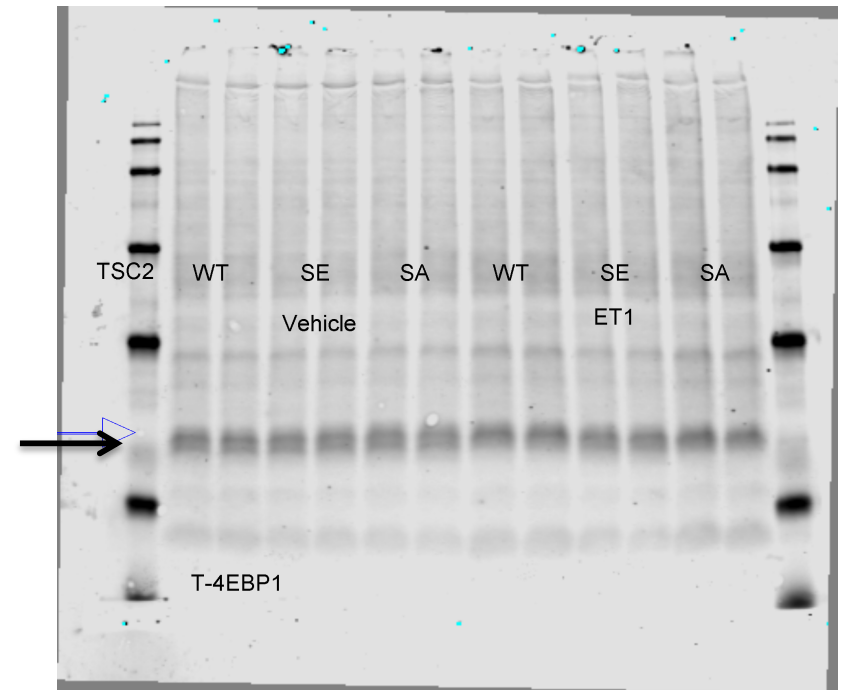

Extended data 4c (middle panels). Technical replicate B; 4-21-16 gel First run.

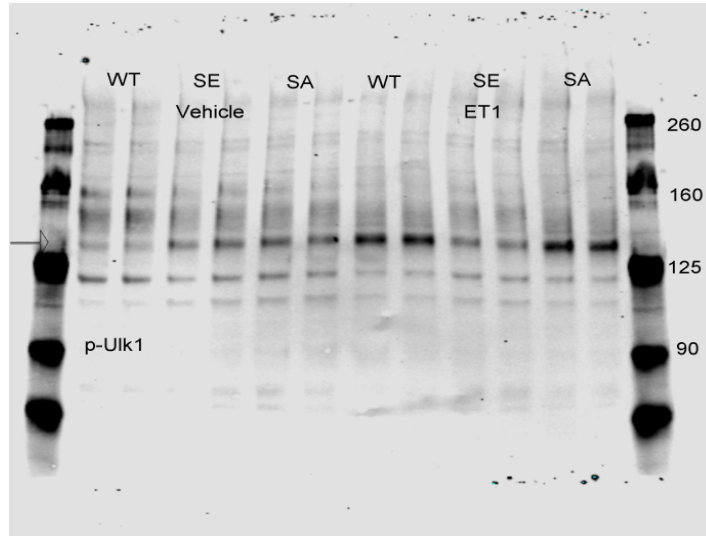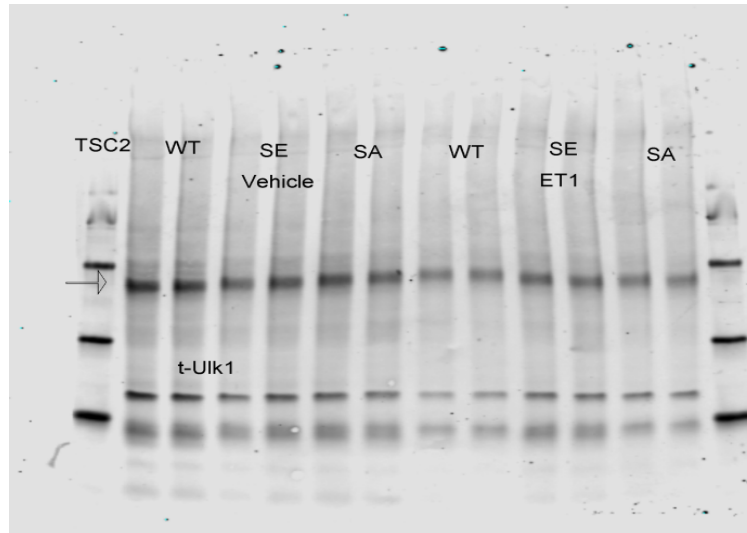

Extended Data 4c (middle panels). replicate 2 – 10/4/16

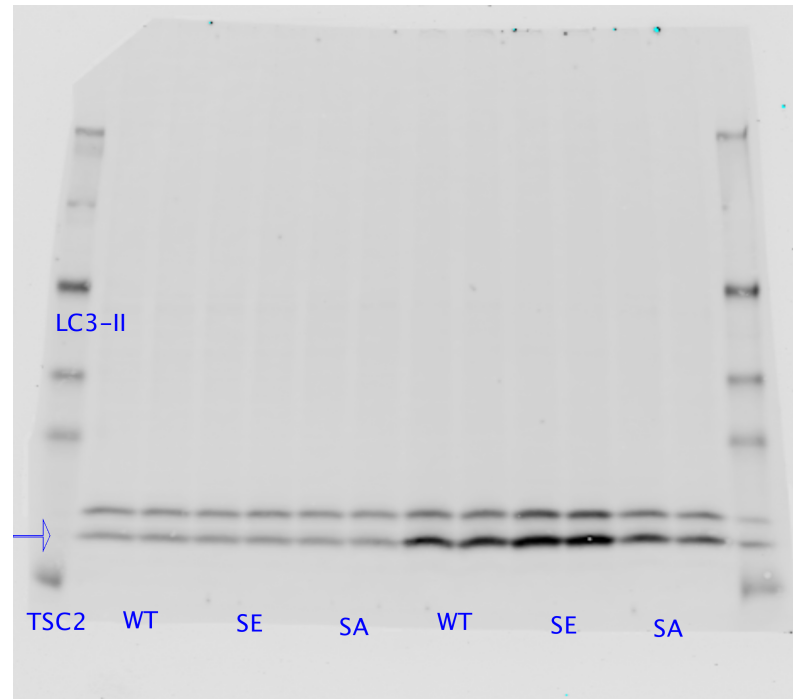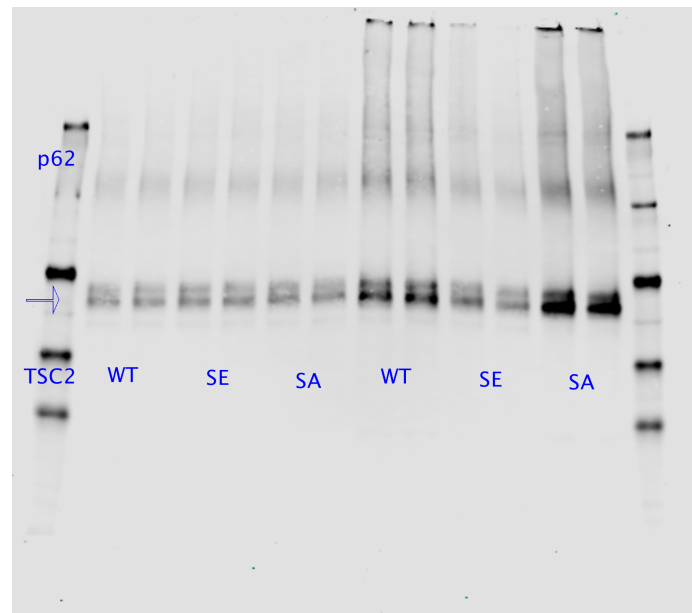

Extended data 4c (lower panels). LC3 – gel 2; p62 Gel 1

p70S6K  
T389  
phospho

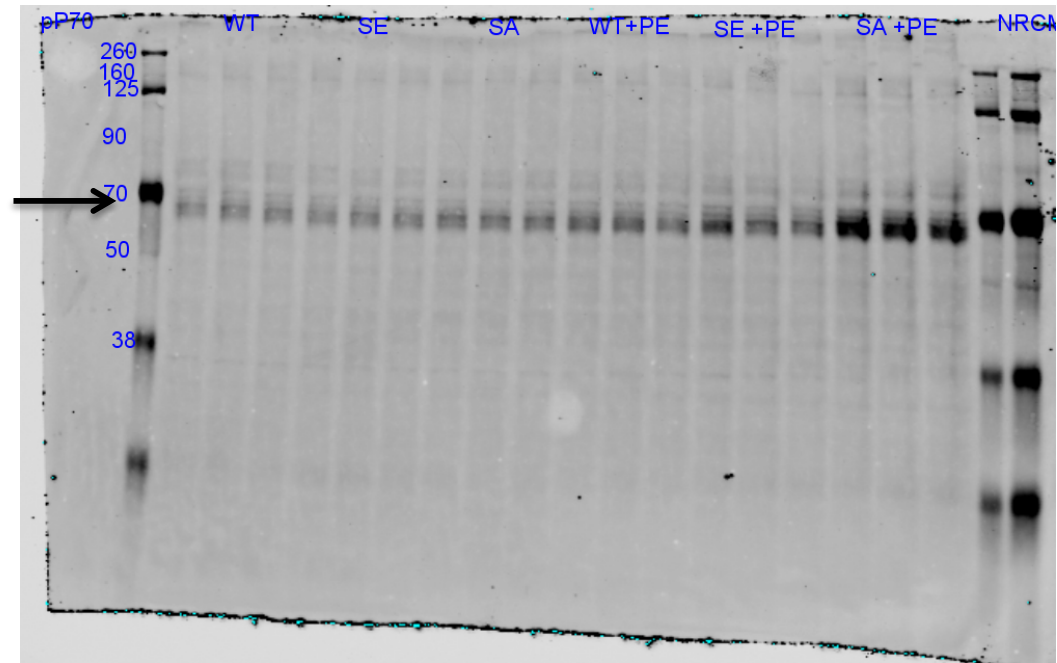

Total  
Protein

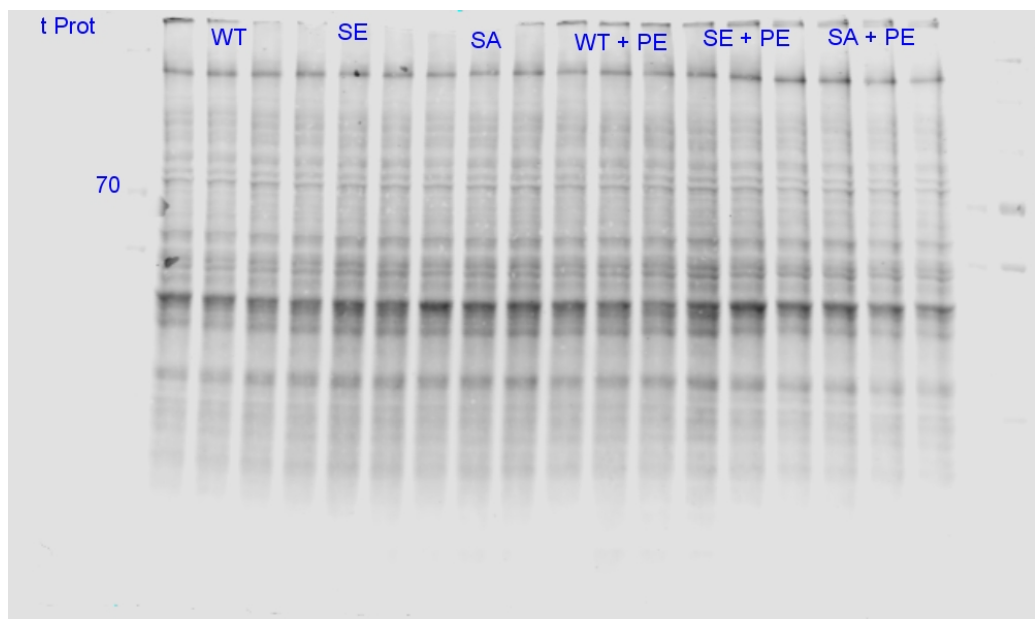



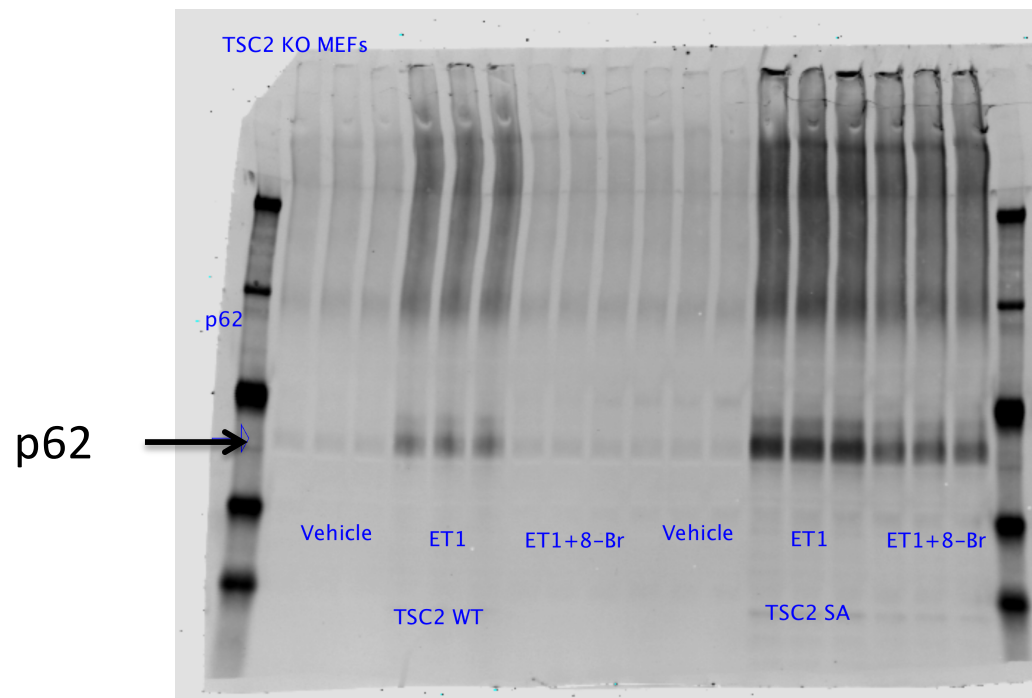

Total Protein

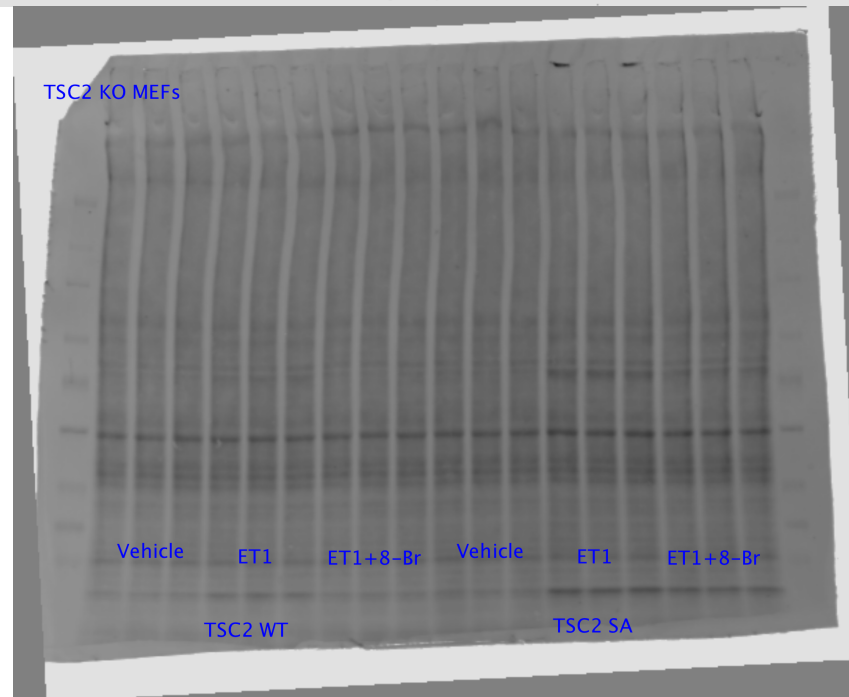

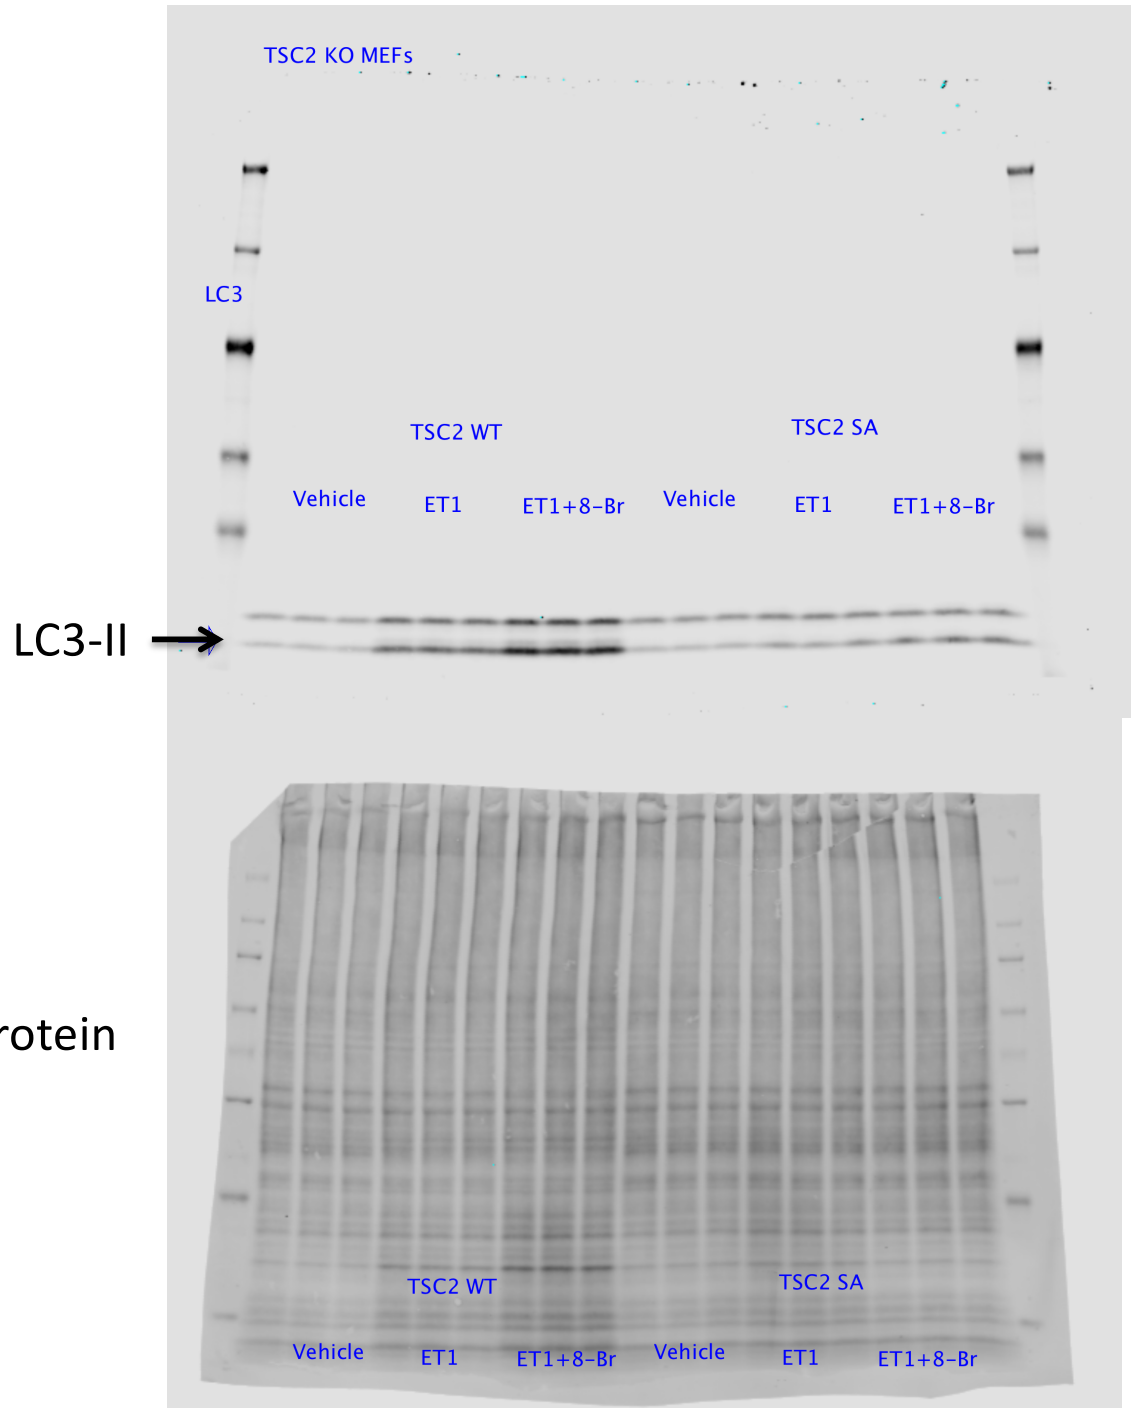

Extended Data 5b - Lower for LC3-II Run 1 – slide 1

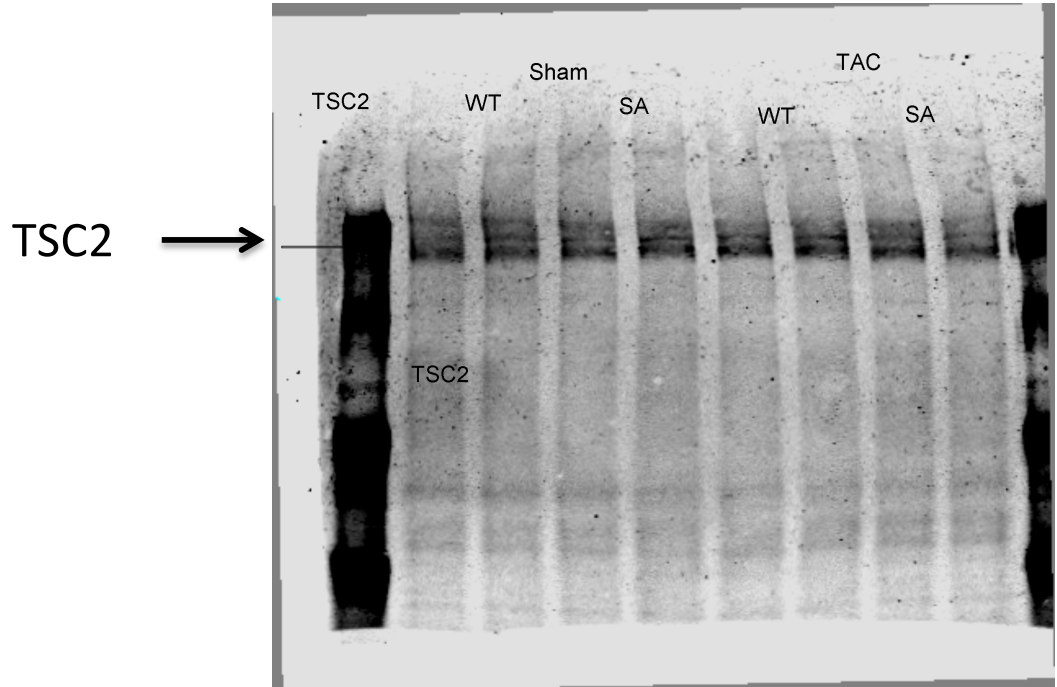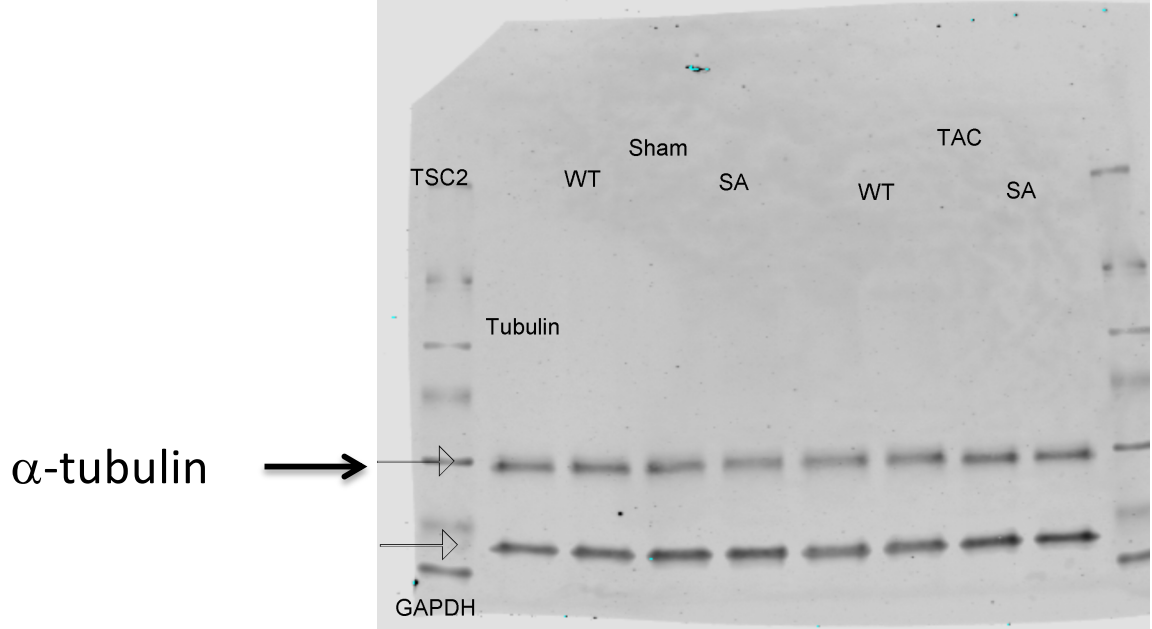

Extended Data 6b

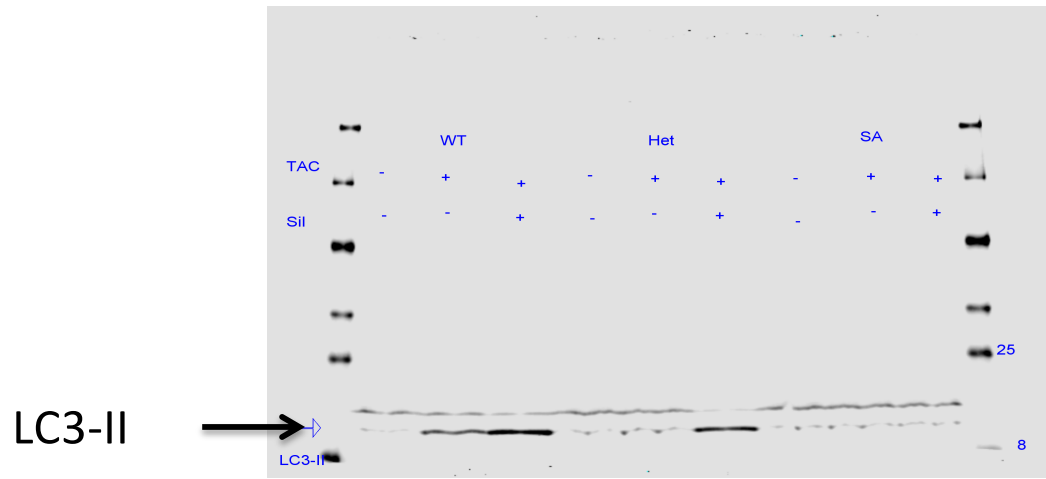

Total Protein

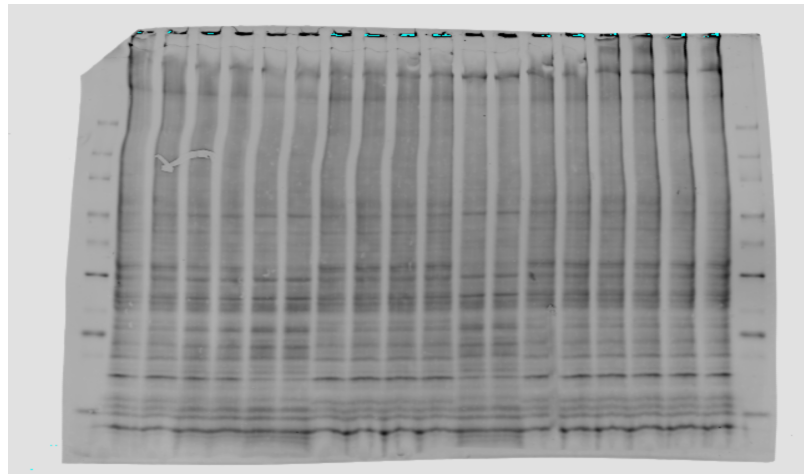

P-p70S6K

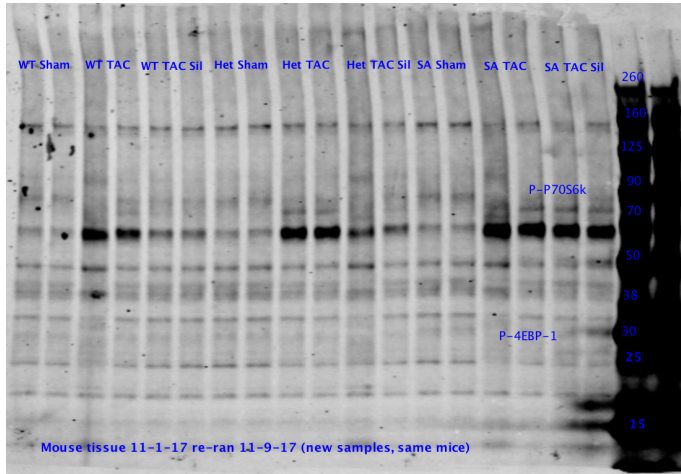

Total-p70S6K

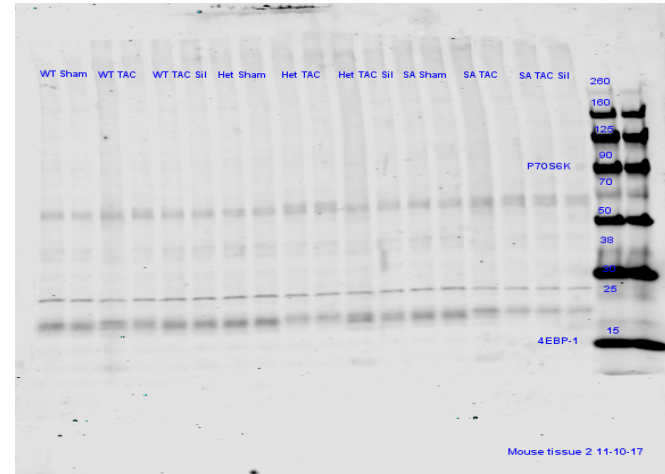

P-Akt

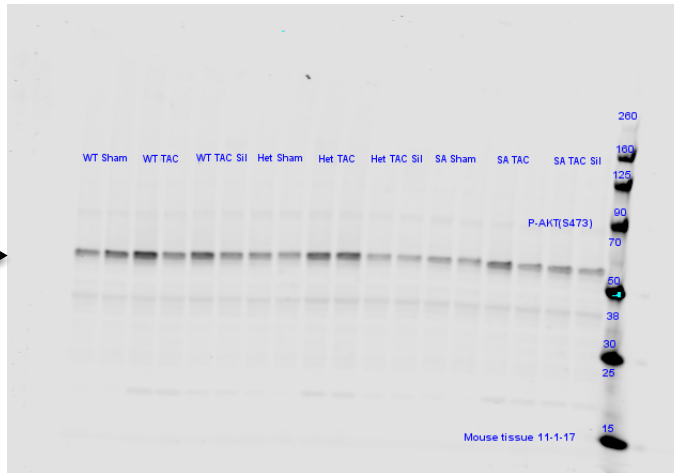

Total-Akt

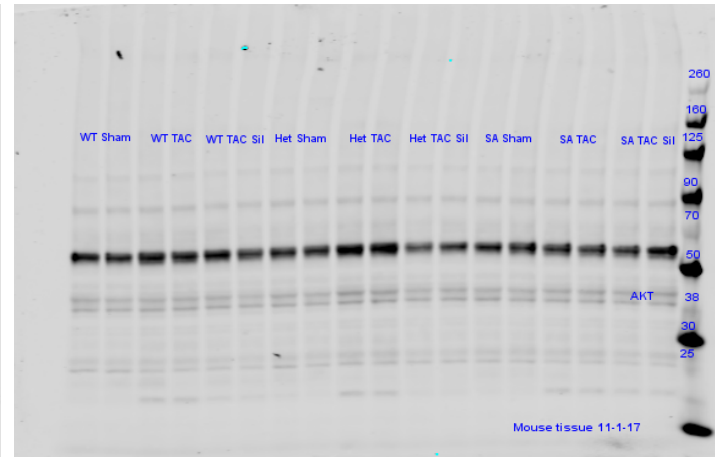

Extended Data 7a

P-FOXO1/3

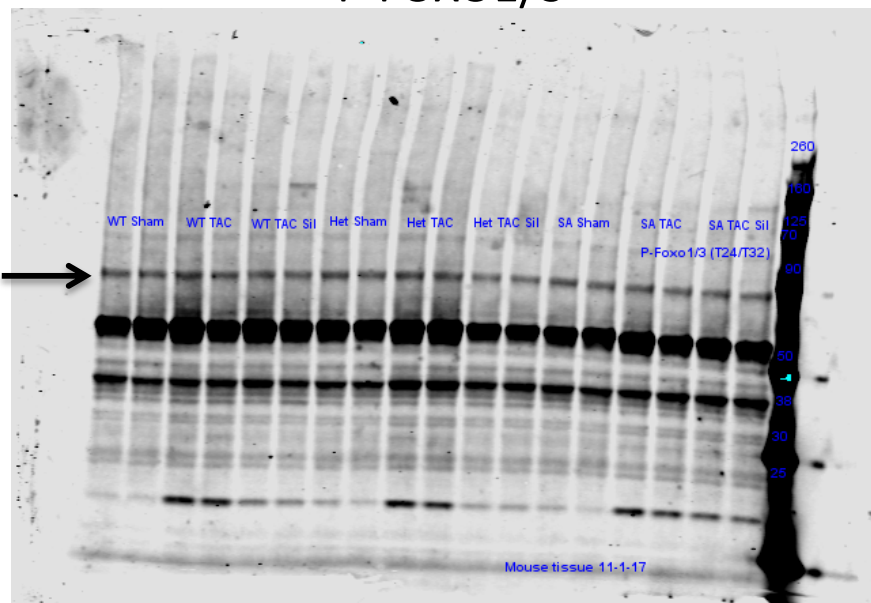

Total-FOXO1

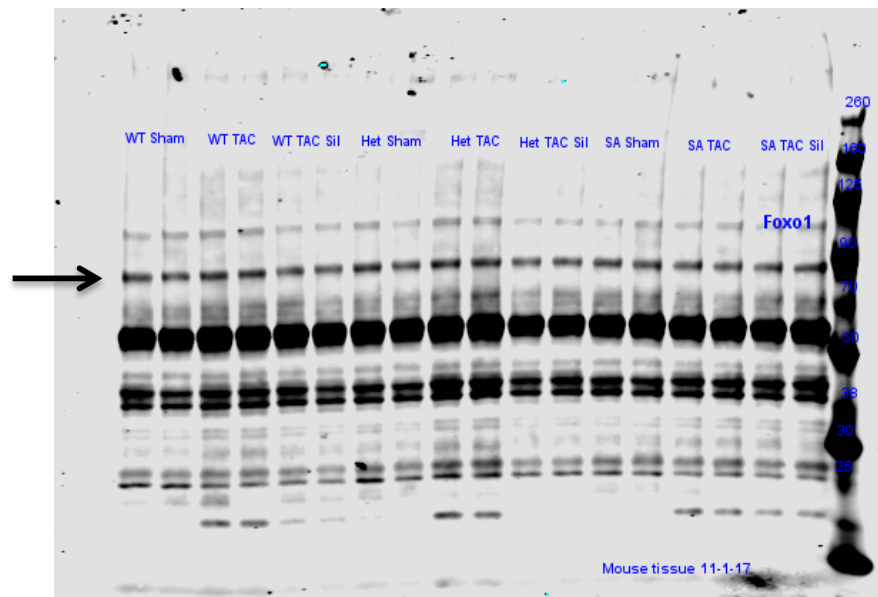

P-NRDG1

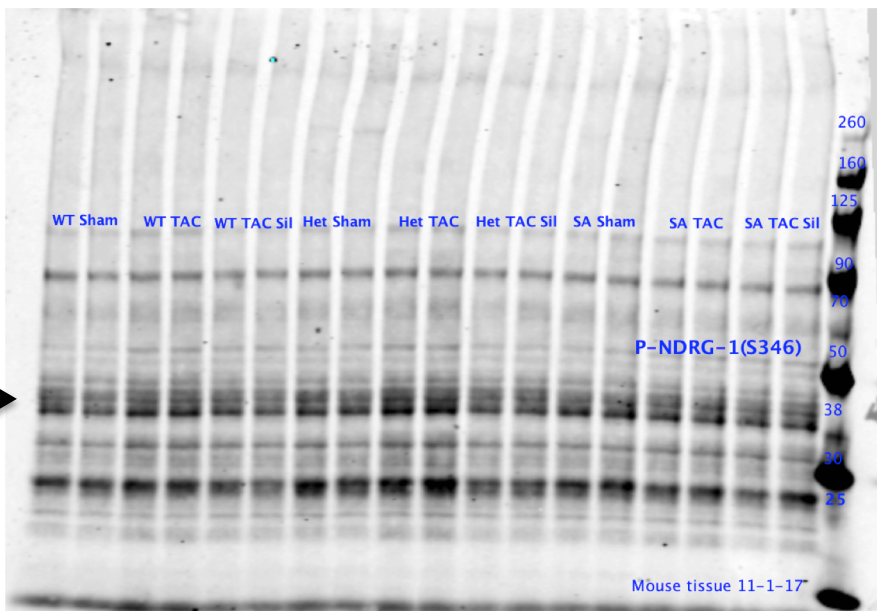

Total-NRDG1

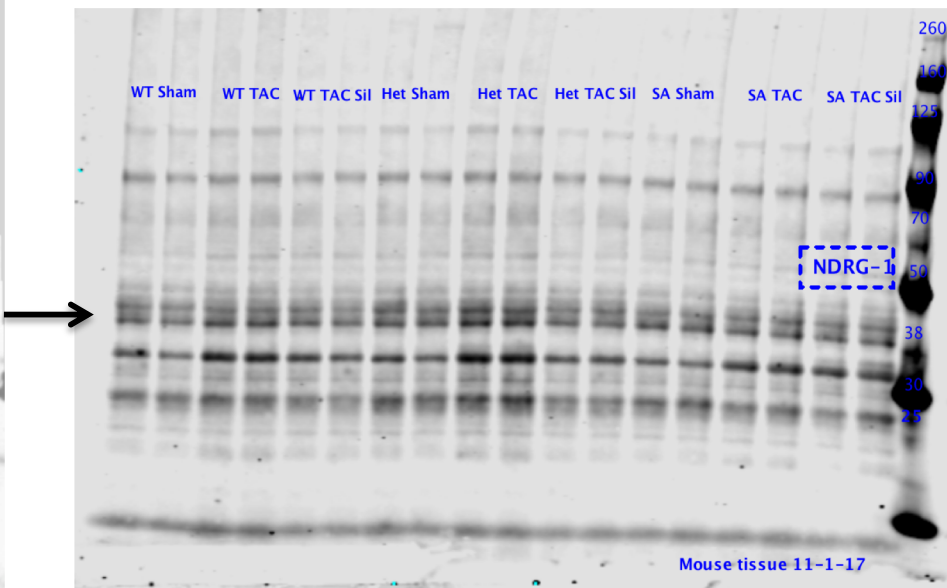

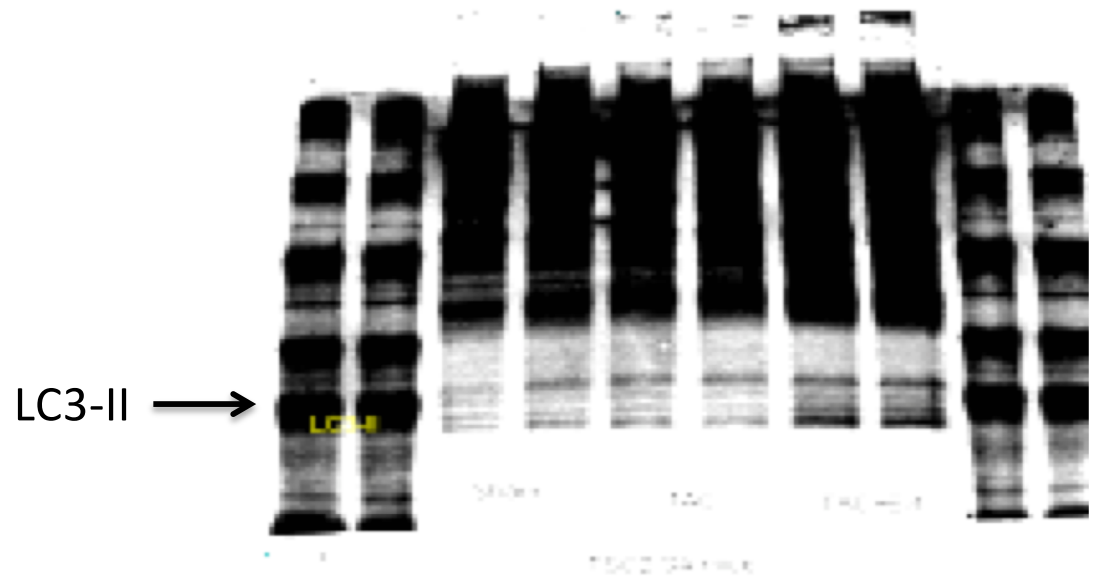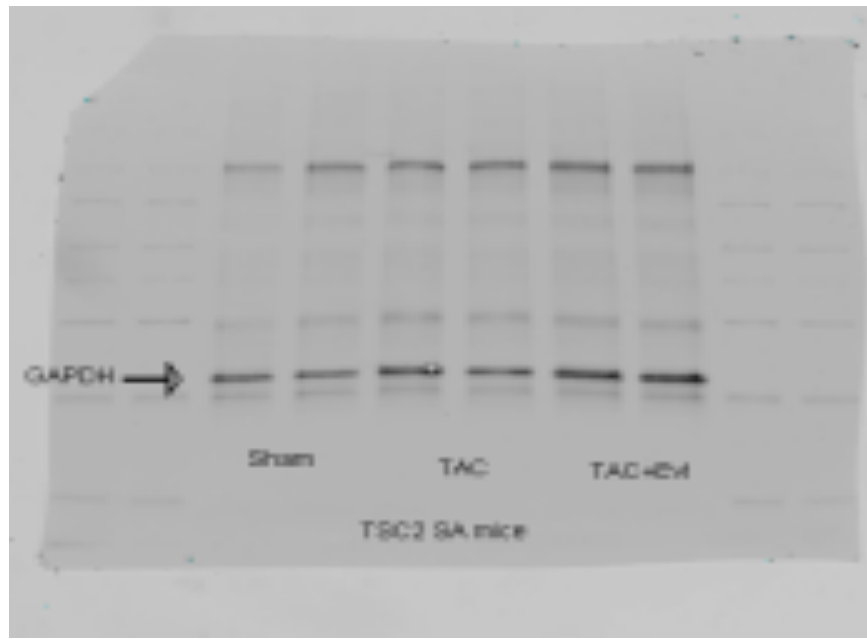

Extended Data 7b – Gel 1

P62

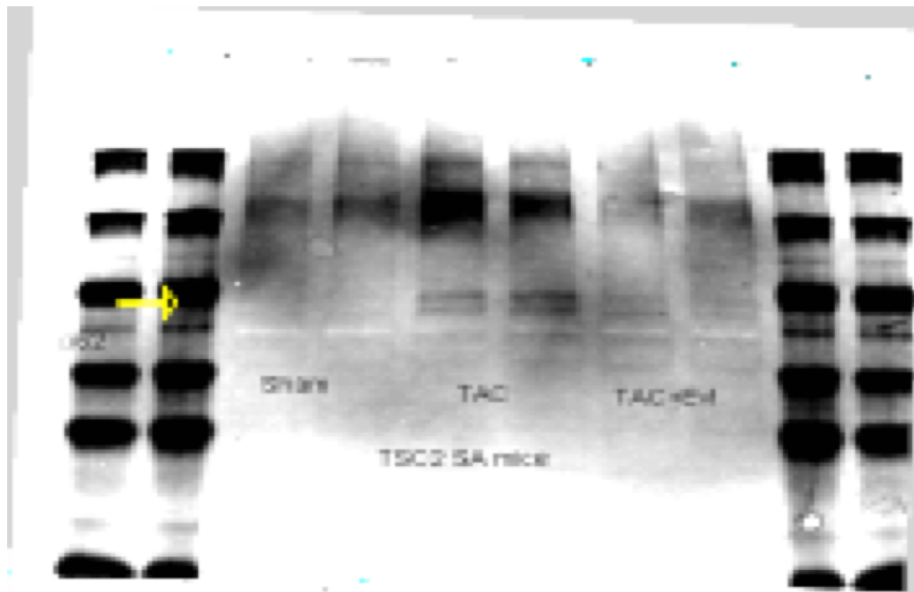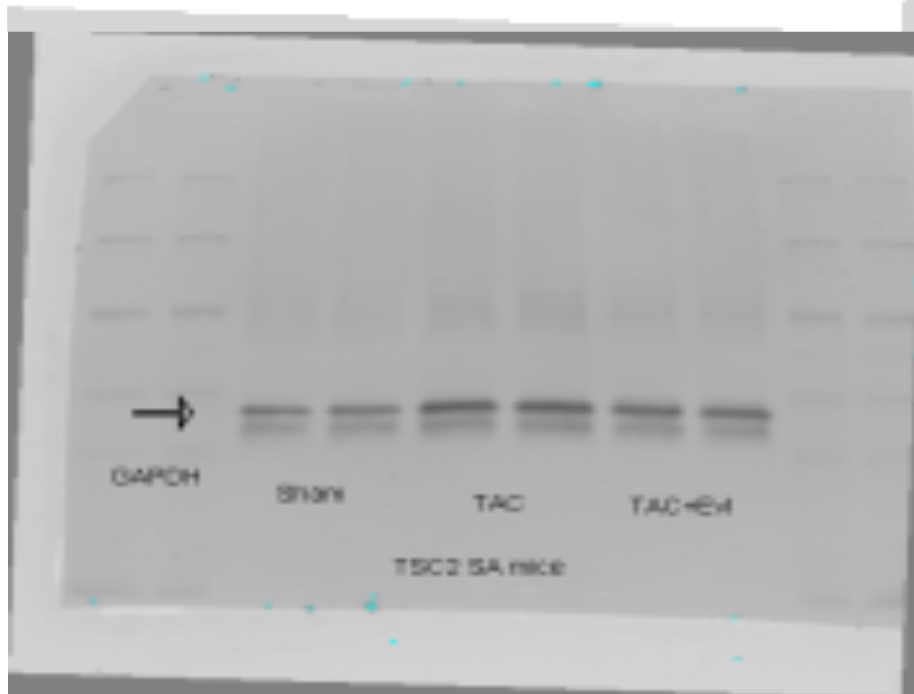

Extended Data 7c – Gel 1



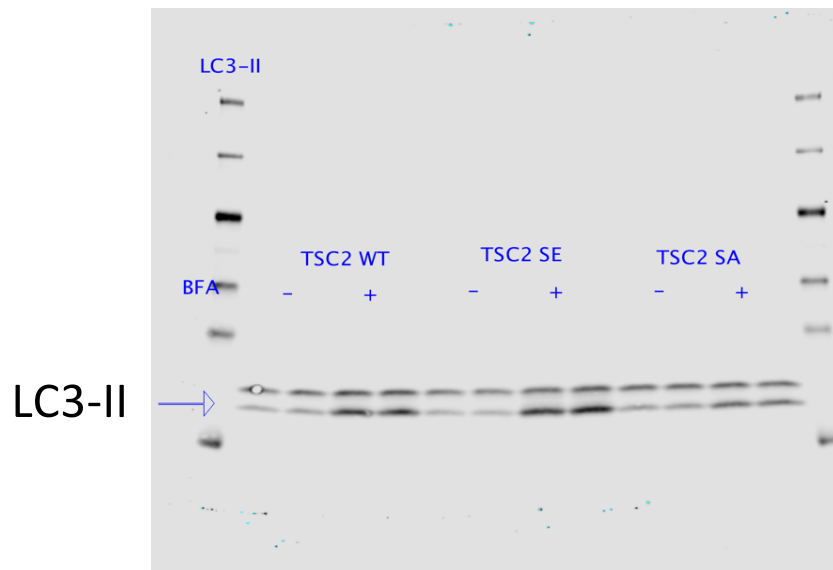

Total Protein

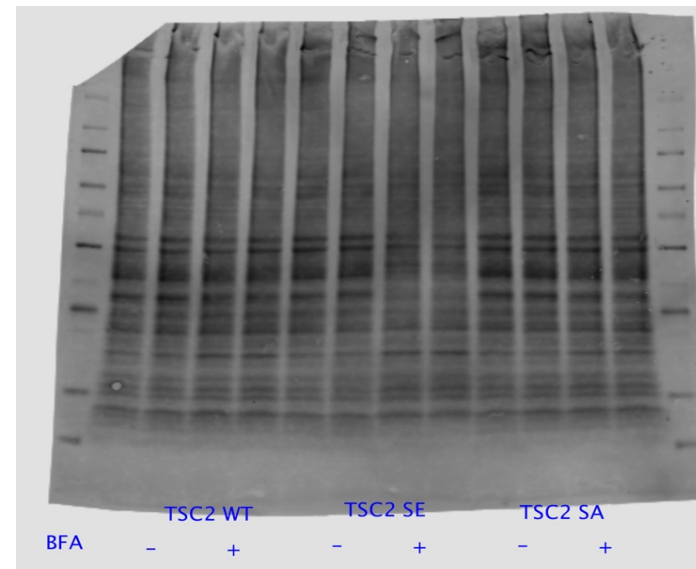

Supplement: NIHMS1516721-supplement-Supp_Figure_1.pdf [file NIHMS1516721-supplement-Supp_Figure_1.pdf]
